# Supplementary material for: Application of bis(oxazoline) in asymmetric β-amination of chalcones
Source: Royal Society of Chemistry journal article supplement (doi:10.1039/c4nj01660b), 2014-11-05
Supplement: c4nj01660b1.pdf [file c4nj01660b1.pdf]

# Supporting Information

## Application of Bis(oxazoline) in Asymmetric $\beta$ -Amination of Chalcones

Tao Deng,<sup>a</sup> Hongjun Wang,<sup>a</sup> and Chun Cai<sup>\* a</sup>

<sup>a</sup>*School of Chemical Engineering, Nanjing University of Science and Technology, 200  
Xiao Ling Wei Street, Nanjing, Jiangsu, People's Republic of China*

\* Corresponding author: Chun Cai. Tel: +86-25-84315514, Fax: +86-25-84315030,

Email: [c.cai@njust.edu.cn](mailto:c.cai@njust.edu.cn)

| <b>Table of Contents</b>                                                    | <b>page</b> |
|-----------------------------------------------------------------------------|-------------|
| 1. General.....                                                             | S2          |
| 2. General procedure.....                                                   | S2          |
| 3. <sup>1</sup> H, <sup>13</sup> C NMR spectras and HPLC chromatograms..... | S3-S25      |

## 1. General

All reagents were purchased from commercial sources and used without treatment, unless otherwise indicated. The products were purified by column chromatography over silica gel. <sup>1</sup>H NMR spectra were recorded at 500 MHz using CDCl<sub>3</sub> as solvent. Elemental analysis was performed on a Vario EL III recorder. Mass spectra were obtained with an automated Fininigan TSQ Advantage mass spectrometer. Most of the products were known compounds and were identified by comparison of their physical and spectra data with those of authentic samples. The enantiomeric excess of the β-imidoketones was determined by HPLC on Ultron ES-OVM column.

## 2. General procedure

### 2.1 Synthesis of chalcones (**1a** as an example)

A mixture of acetophenone (10 mmol) and benzaldehyde (1.1 equiv) in anhydrous EtOH (15 mL) was stirred at room temperature for 5 min. Then, NaOH (3 equiv) was added. The reaction mixture was stirred at room temperature overnight until aldehyde consumption. After that, HCl (10%) was added until neutrality. Then dichloromethane was added to dilute the reaction mixture. The organic layer was dried over anhydrous Na<sub>2</sub>SO<sub>4</sub> and concentrated on rotavapor under reduced pressure. Finally, the residue was purified by silica gel column chromatography to give **1a**.

### 2.2 Typical procedure for the β-amination of chalcones

General procedure for the preparation of **2** (**2a** as an example): A mixture of chalcone **1a** (208 mg, 1.0 mmol), L3 (30.6 mg, 0.1 mmol), and DBU (0.18 mL, 1.2 mmol) in MeCN (2.0 mL) was stirred at room temperature. To the mixture were then added NBS (213 mg, 1.2 mmol). After the starting material **1a** was consumed as indicated by TLC, the reaction mixture was poured into water and then extracted with CH<sub>2</sub>Cl<sub>2</sub> (3 × 10 mL). The combined organic phase was washed with water (3 × 10 mL), dried over anhydrous MgSO<sub>4</sub>, filtered and concentrated under reduced pressure. The

crude product was purified by flash chromatography.

### 3. $^1\text{H}$ , $^{13}\text{C}$ NMR spectras and HPLC chromatograms

#### 3.1 1-(3-Oxo-1,3-diphenylpropyl)pyrrolidine-2,5-dione (2a)

This compound was prepared according to the Section 2.2 and purified by column chromatography (petroleum ether : ethyl acetate = 6 : 1) to give a white solid (76% yield); m.p. 118-120°C;  $^1\text{H}$  NMR (500 MHz,  $\text{CDCl}_3$ ):  $\delta$  : 7.99-7.97 (m, 2H), 7.59-7.57 (m, 3H), 7.47 (d,  $J$  = 7.5 Hz, 2H), 7.38-7.31 (m, 3H), 5.91-5.88 (m, 1H), 4.64-4.58 (m, 1H), 3.71-3.66 (m, 1H), 2.66-2.63 (m, 4H).  $^{13}\text{C}$  NMR (125 MHz,  $\text{CDCl}_3$ ):  $\delta$ : 28.0, 40.0, 51.2, 127.8, 128.6, 128.9, 129.2, 129.8, 134.6, 137.7, 141.2, 177.5, 198.2. HPLC analysis: Ultron ES-OVM column, 30:70 alcohol/ $\text{KH}_2\text{PO}_4$  (0.02 mol/L), flow rate = 1.8 ml/min, UV = 254 nm, major enantiomer  $t_1$  = 1.87 min, minor enantiomer  $t_2$  = 0.72 min; 90% *ee*.

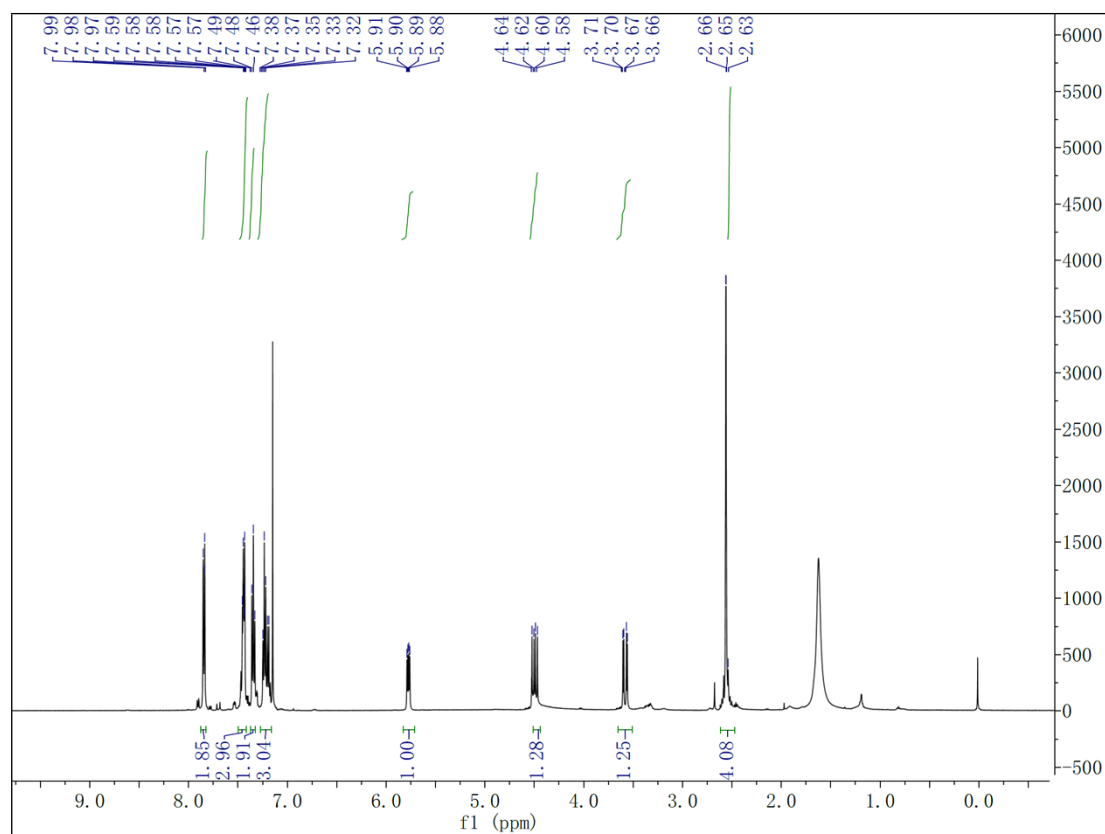

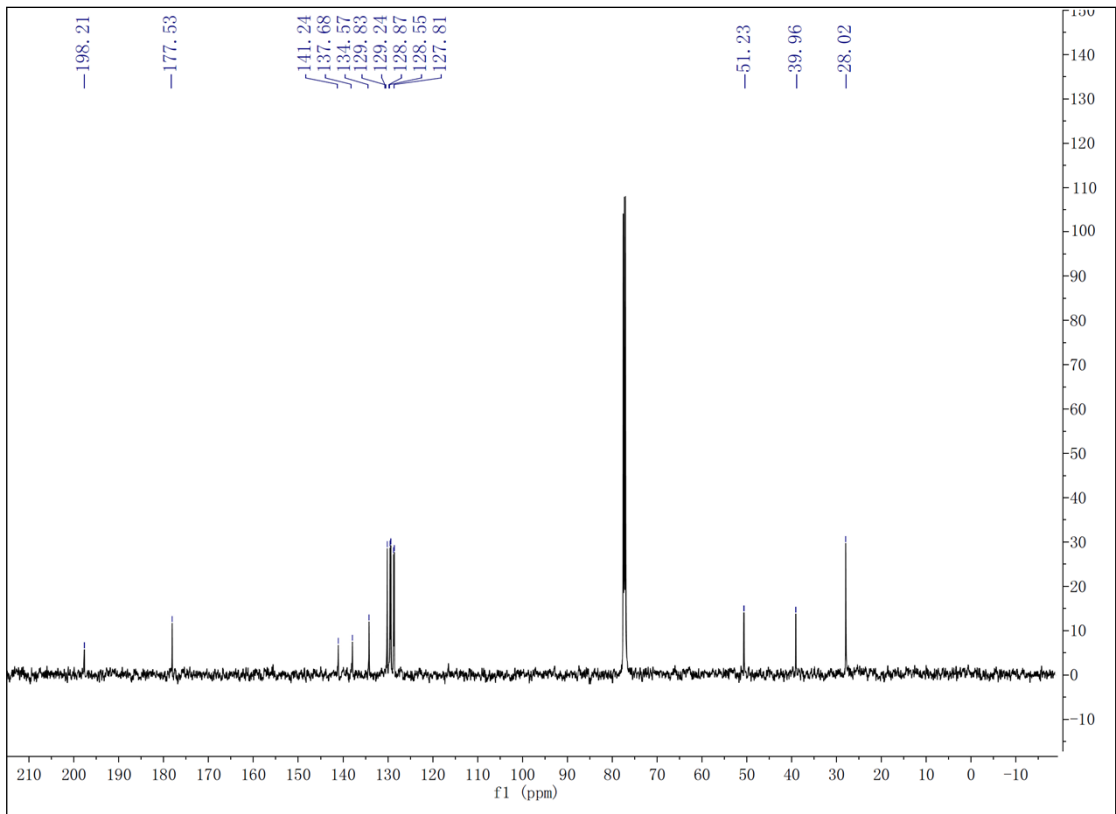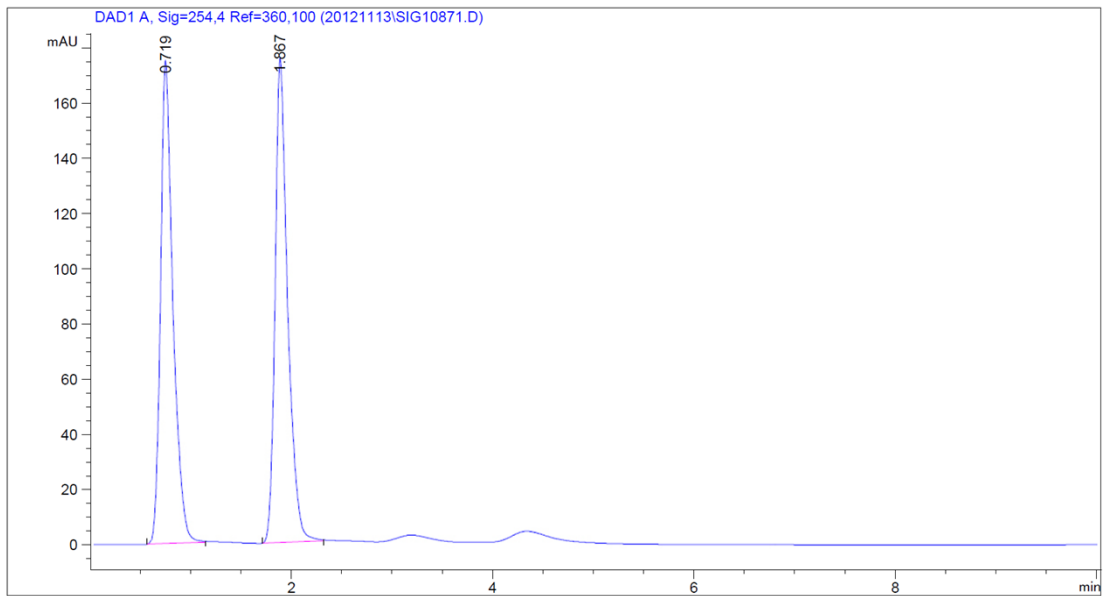

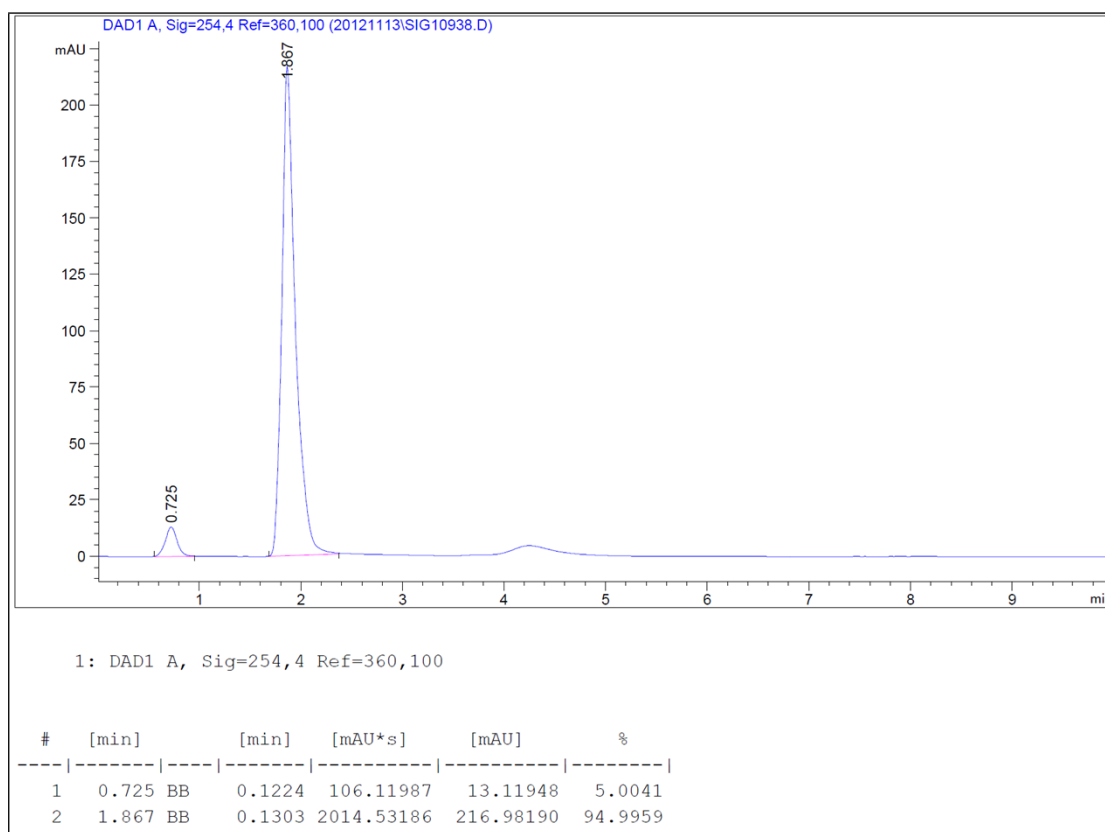

### 3.2 1-(1-(4-Chlorophenyl)-3-oxo-3-phenylpropyl)pyrrolidine-2,5-dione(2b)

This compound was prepared according to the Section 2.2 and purified by column chromatography (petroleum ether : ethyl acetate = 6 : 1) to give a white solid (83% yield); m.p. 142-144°C. <sup>1</sup>H NMR (500 MHz, CDCl<sub>3</sub>): δ : 7.97 (d, J = 7.6 Hz, 2H), 7.61-7.58 (m, 2H), 7.54-7.46 (m, 4H), 7.34-7.28 (d, J = 8.3 Hz, 2H), 5.89-5.86 (m, 1H), 4.52-4.47 (m, 2H), 3.75-3.67 (m, 2H), 2.68-2.64 (m, 4H). <sup>13</sup>C NMR (125MHz, CDCl<sub>3</sub>) δ: 28.3, 39.2, 49.9, 127.4, 128.0, 128.7, 129.2, 133.5, 134.1, 136.6, 137.1, 176.5, 196.1. HPLC analysis: Ultron ES-OVM column, 32:68 alcohol/KH<sub>2</sub>PO<sub>4</sub> (0.02 mol/L), flow rate = 1.5 ml/min, UV = 273nm, major enantiomer t<sub>1</sub> = 3.49 min, minor enantiomer t<sub>2</sub> = 2.34 min; 94% ee.

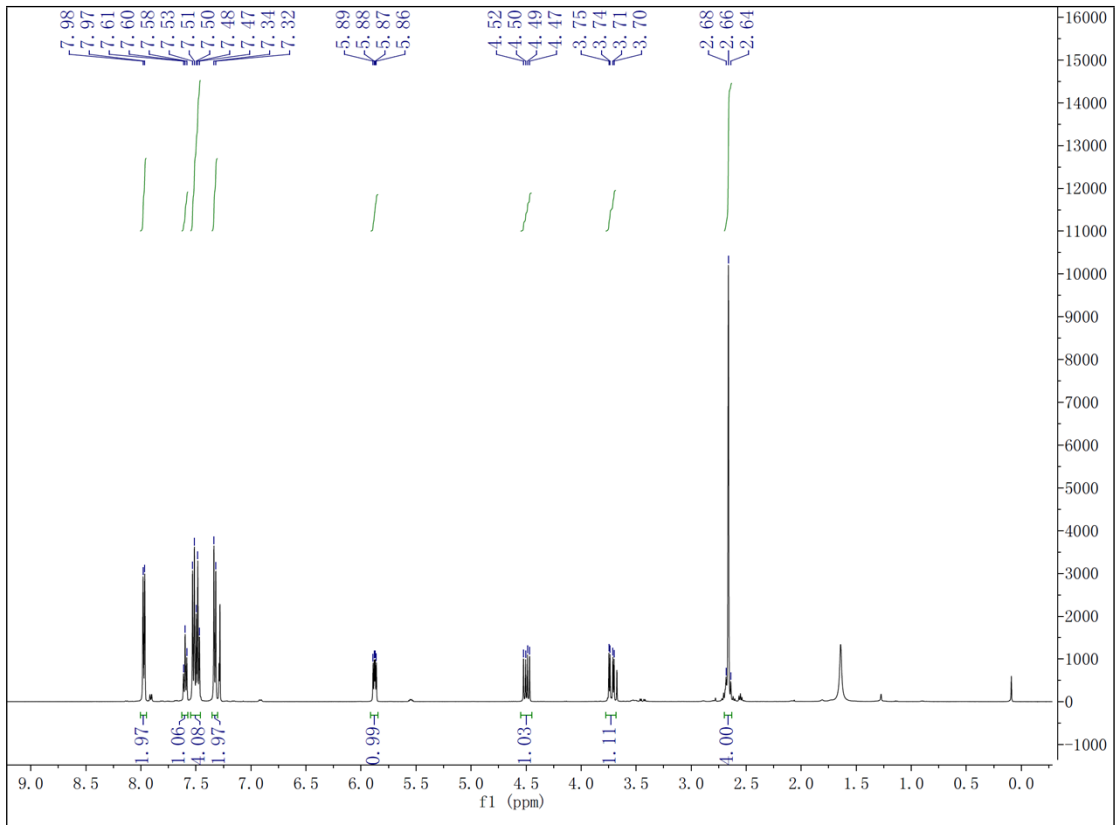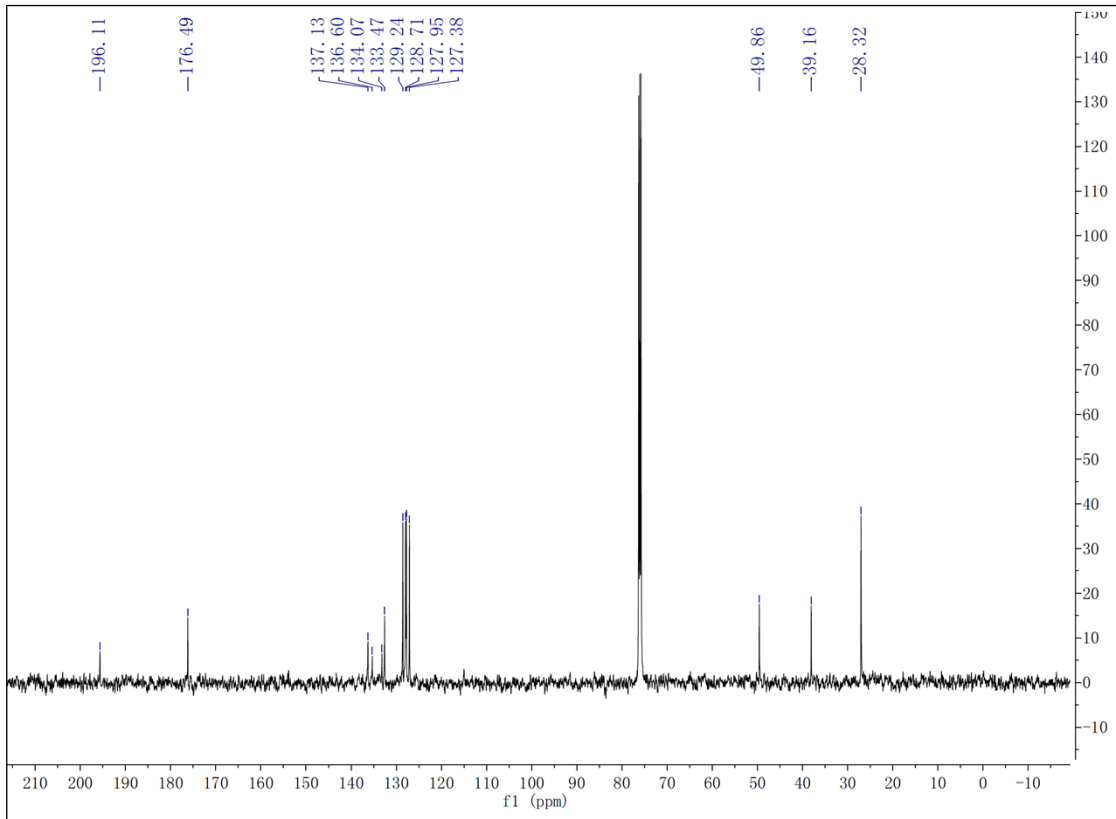

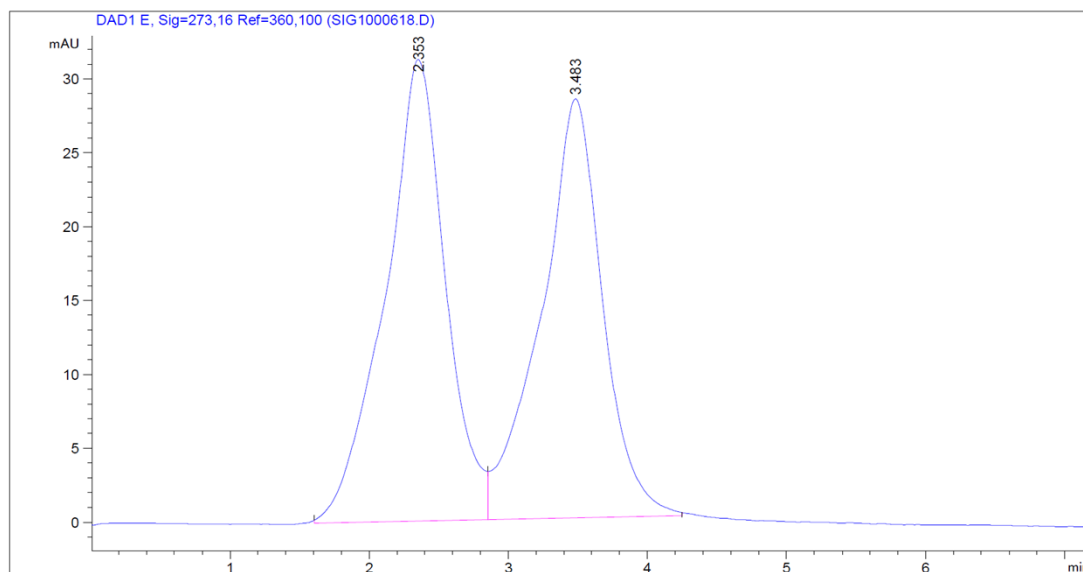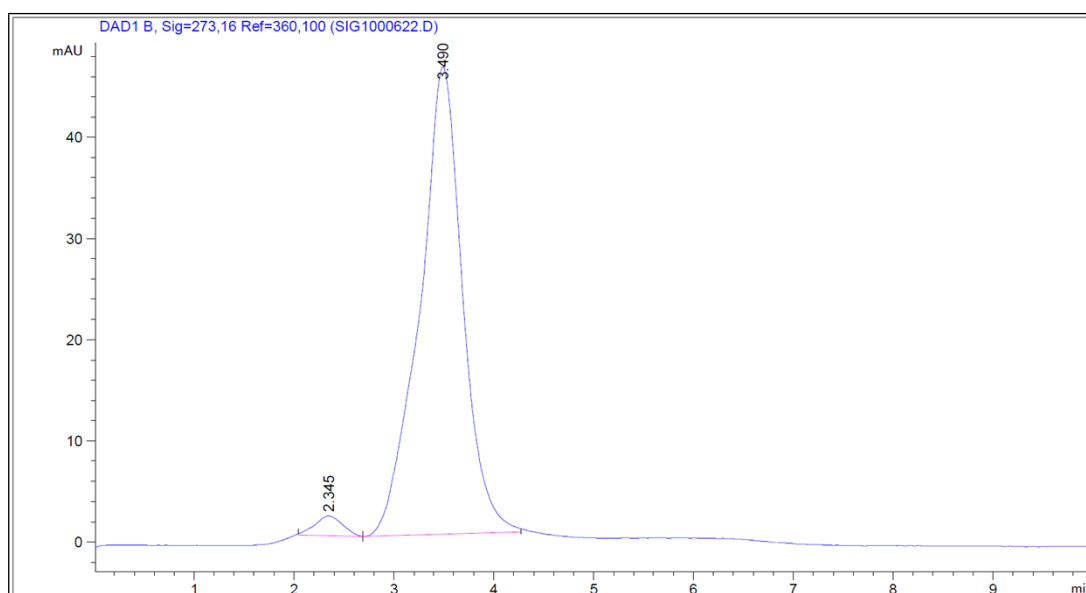

1: DAD1 B, Sig=273,16 Ref=360,100

| # | [min]    | [min]  | [mAU*s]    | [mAU]    | %       |
|---|----------|--------|------------|----------|---------|
| 1 | 2.345 BV | 0.2834 | 37.37333   | 1.95172  | 2.6449  |
| 2 | 3.490 VB | 0.4294 | 1375.63831 | 46.19231 | 97.3551 |

### 3.3 1-(3-Oxo-3-phenyl-1-(p-tolyl)propyl)pyrrolidine-2,5-dione(2c)

This compound was prepared according to the Section 2.2 and purified by column chromatography (petroleum ether : ethyl acetate = 7 : 1) to give a white solid (73% yield); m.p. 120-122°C. <sup>1</sup>H NMR (500 MHz, CDCl<sub>3</sub>) δ: 8.03-7.92 (m, 2H), 7.59 (t, J = 7.4 Hz, 1H), 7.53-7.42 (m, 4H), 7.17 (d, J = 7.9 Hz, 2H), 5.88-5.85 (m, 1H),

4.61-4.55(m, 1H), 3.70-3.65 (m, 1H), 2.66-2.62 (m, 4H), 2.35 (s, 3H). <sup>13</sup>C NMR (125MHz, CDCl<sub>3</sub>) δ: 20.1, 27.0, 38.2, 50.0, 127.0, 127.1, 127.7, 128.4, 132.4, 135.0, 135.5, 137.1, 176.3, 196.1. HPLC analysis: Ultron ES-OVM column, 30:70 alcohol/KH<sub>2</sub>PO<sub>4</sub> (0.02 mol/L), flow rate = 1.8 ml/min, UV = 254 nm, major enantiomer t<sub>1</sub> = 1.84 min, minor enantiomer t<sub>2</sub> = 0.71 min; 80% ee.

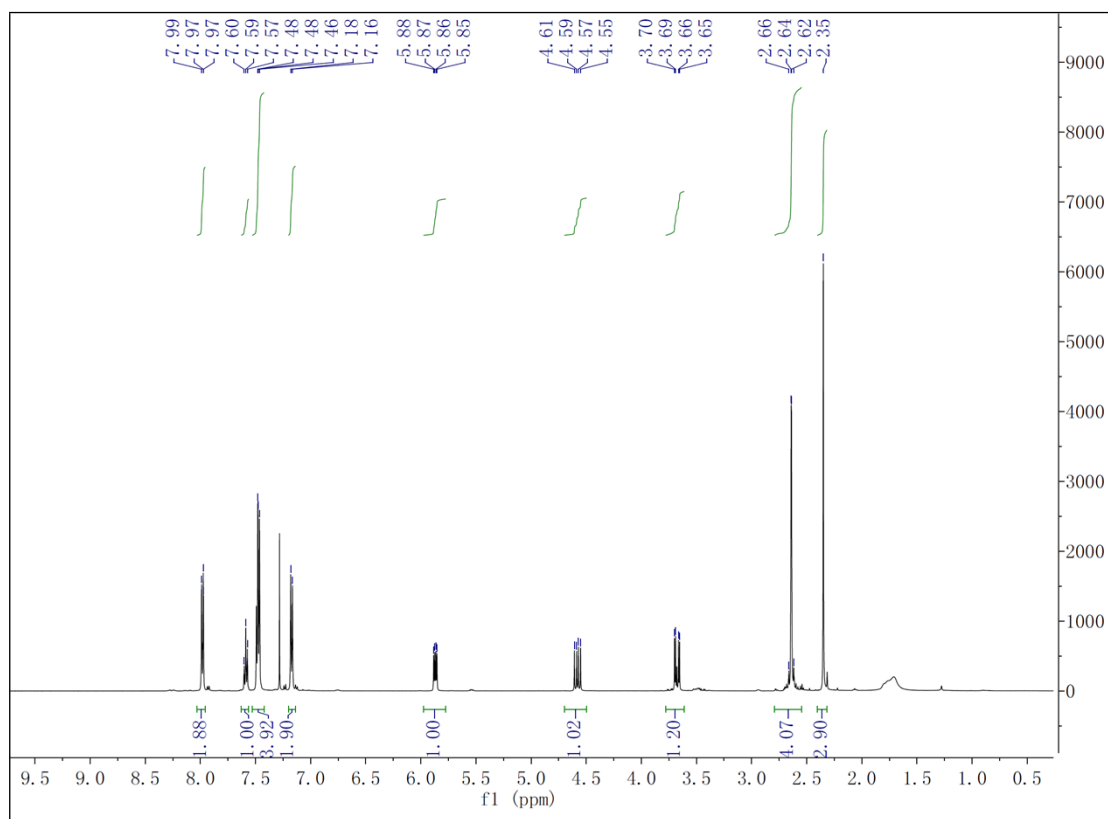



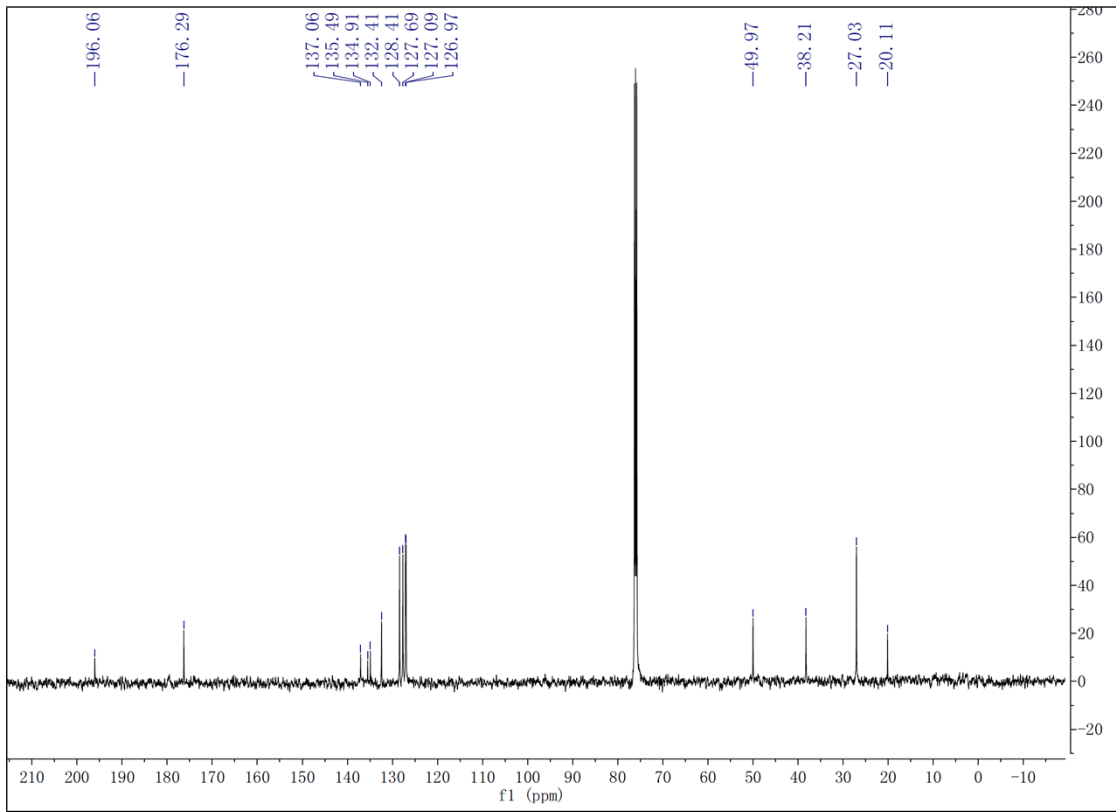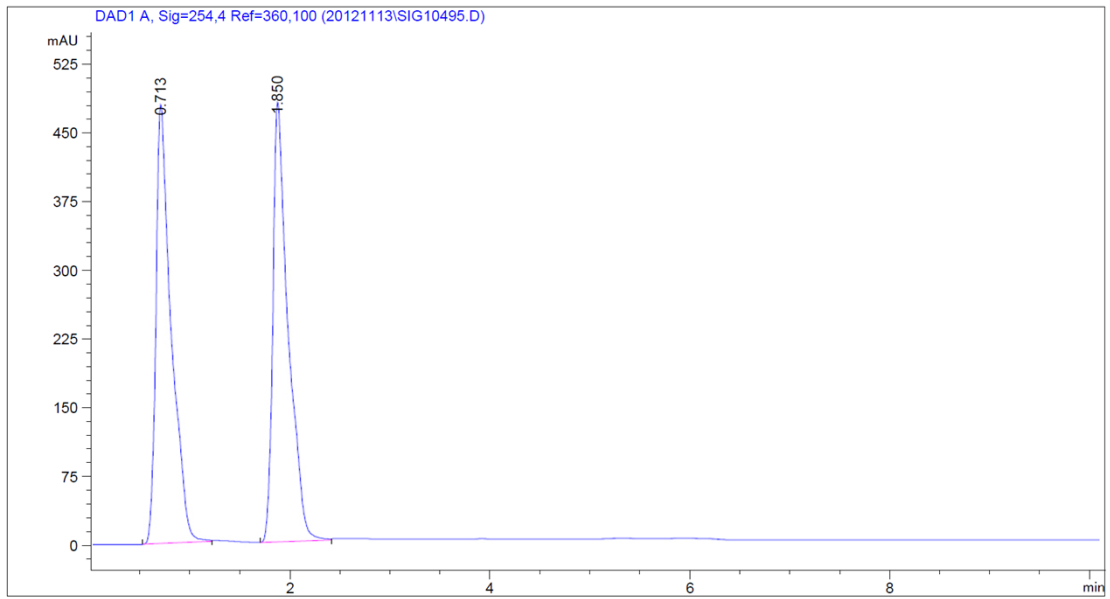

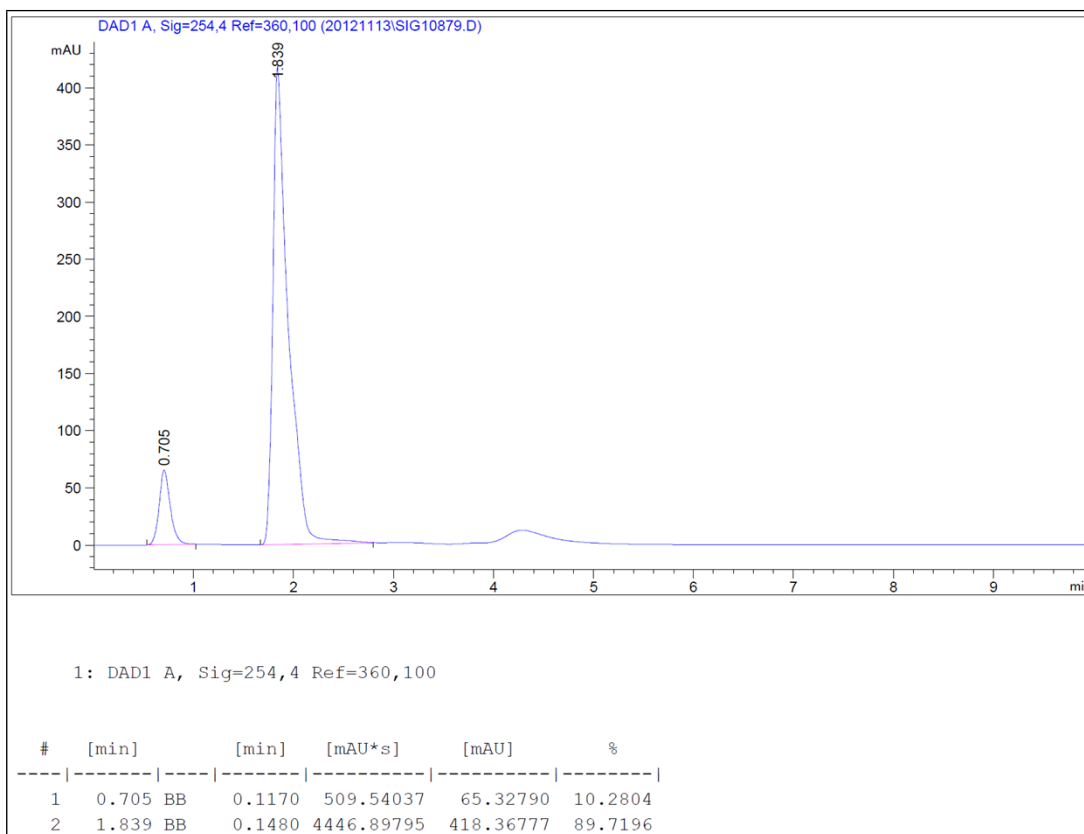

### 3.4 1-(1-(4-(Dimethylamino)phenyl)-3-oxo-3-phenylpropyl)pyrrolidine-2,5-dione(2d)

This compound was prepared according to the Section 2.2 and purified by column chromatography (petroleum ether : ethyl acetate = 8 : 1) to give a white solid (62% yield); m.p. 147-149°C. <sup>1</sup>H NMR (500 MHz, CDCl<sub>3</sub>) δ: 8.17-8.08(m, 2H), 7.77(d, *J* = 5.0 Hz, 1H), 7.58-7.56 (m, 3H), 6.76 (d, *J* = 2.5Hz, 2H), 6.66 (d, *J* = 5.0 Hz, 1H), 5.80-5.72(m, 1H), 4.61-4.56(m, 1H), 3.53-3.48 (m, 1H), 2.96 (s, 6H), 2.80-2.78 (m, 4H). <sup>13</sup>C NMR (125MHz, CDCl<sub>3</sub>) δ: 27.8, 38.8, 40.5, 50.9, 111.9, 127.5, 128.5, 128.9, 129.2, 132.1, 138.9, 148.3, 177.5, 197.8. ESI-MS (*m/z*): 351 ([M+H]<sup>+</sup>). Anal. calcd. for C<sub>21</sub>H<sub>22</sub>N<sub>2</sub>O<sub>3</sub>: C, 71.98; H, 6.33; N, 7.99. Found: C, 71.77; H, 6.43; N, 8.11. HPLC analysis: Ultron ES-OVM column, 30:70 alcohol/KH<sub>2</sub>PO<sub>4</sub> (0.02 mol/L), flow rate = 1.8 ml/min, UV = 254 nm, major enantiomer *t*<sub>1</sub> = 0.65 min, minor enantiomer *t*<sub>2</sub> = 1.82 min; 40% *ee*.

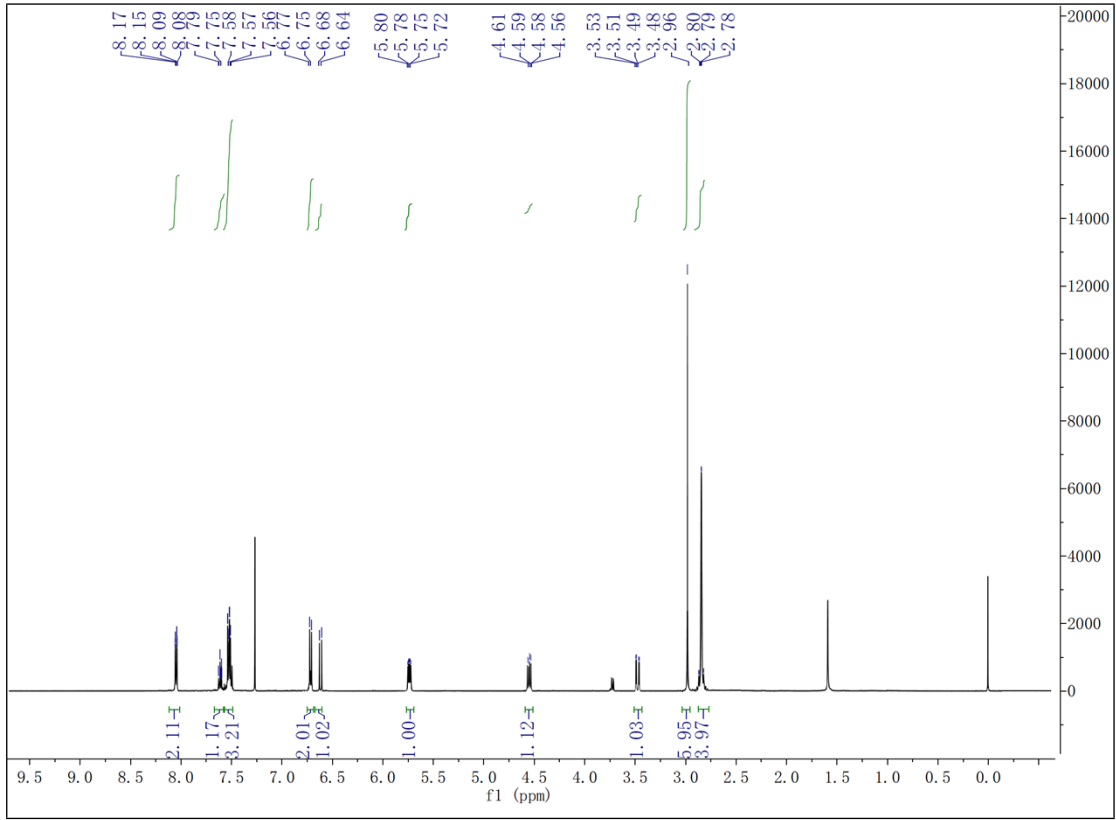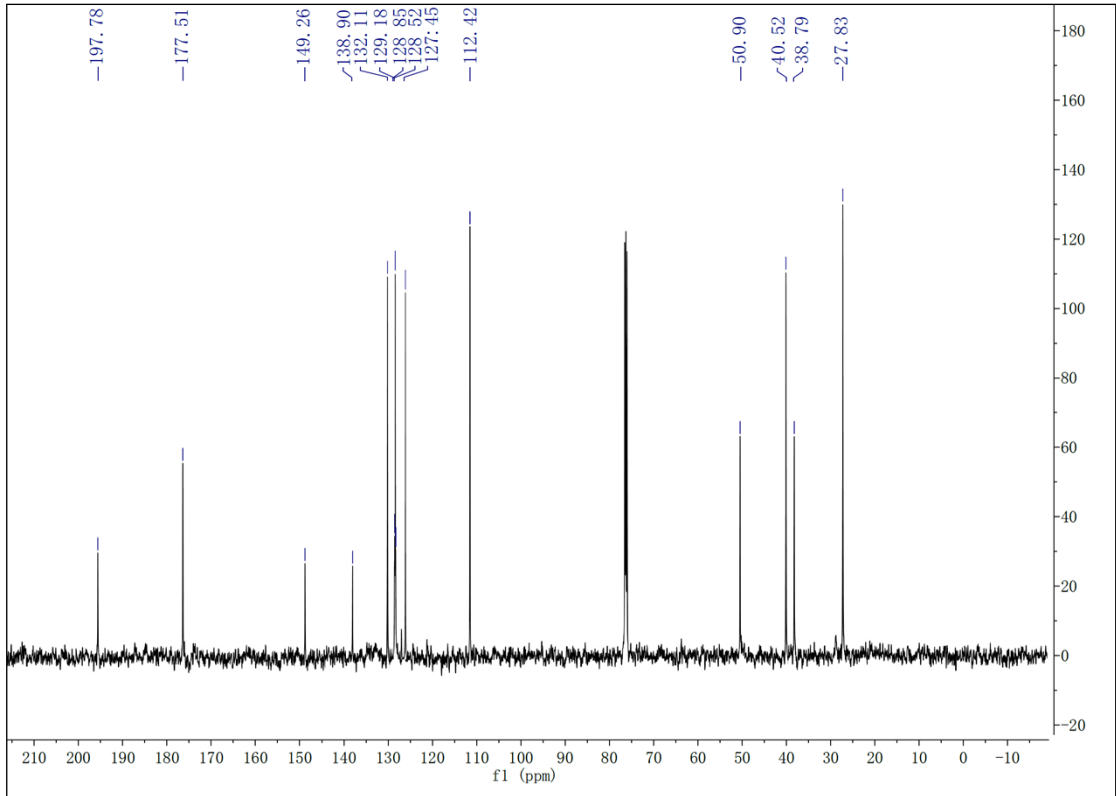

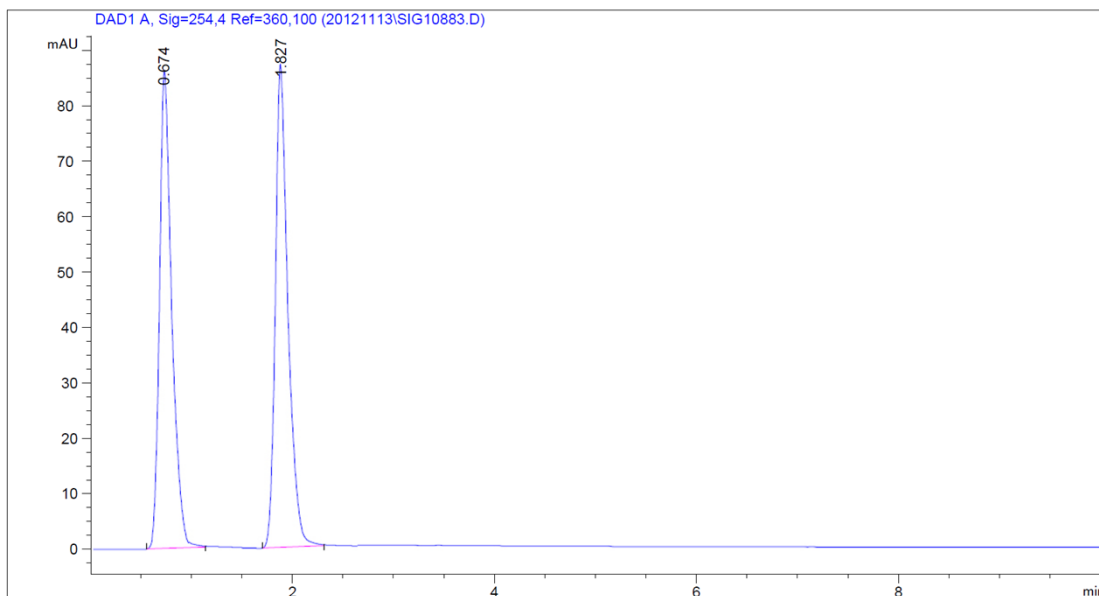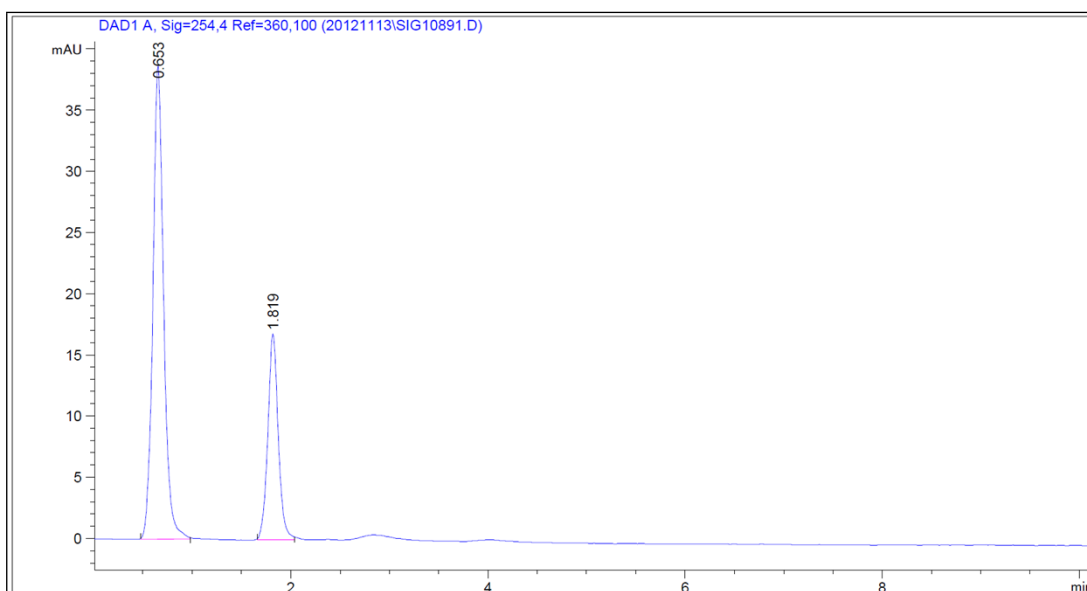

1: DAD1 A, Sig=254,4 Ref=360,100

| # | [min] |    | [min]  | [mAU*s]   | [mAU]    | %       |
|---|-------|----|--------|-----------|----------|---------|
| 1 | 0.653 | BB | 0.1142 | 292.34973 | 38.68309 | 70.3339 |
| 2 | 1.819 | BB | 0.1115 | 123.31005 | 16.83071 | 29.6661 |

### 3.5 1-(3-oxo-3-phenyl-1-(pyridin-4-yl)propyl)pyrrolidine-2,5-dione (2e)

This compound was prepared according to the Section 2.2 and purified by column chromatography (petroleum ether : ethyl acetate = 6 : 1) to give a yellow solid (67% yield); m.p. 140-142°C. <sup>1</sup>H NMR (500 MHz, CDCl<sub>3</sub>) δ 8.57 (d, J = 4.5 Hz, 2H), 7.95-7.93 (m, 2H), 7.59-7.56 (m, 1H), 7.47-7.44 (m, 2H), 7.40 (d, J = 6.0 Hz, 2H), 5.87-

5.84 (m, 1H), 4.44-4.38 (m, 1H), 3.77-3.72 (m, 1H), 2.69-2.65 (m, 4H). <sup>13</sup>C NMR (125MHz, CDCl<sub>3</sub>) δ: 28.1, 38.7, 50.1, 122.8, 128.7, 128.9, 133.8, 136.2, 147.2, 150.5, 177.1, 196.3. ESI-MS (m/z): 309 ([M+H]<sup>+</sup>). Anal. calcd. for C<sub>18</sub>H<sub>16</sub>N<sub>2</sub>O<sub>3</sub>: C, 70.12; H, 5.23; N, 9.09. Found: C, 70.31; H, 5.15; N, 9.23. HPLC analysis: Ultron ES-OVM column, 30:70 alcohol/KH<sub>2</sub>PO<sub>4</sub> (0.02 mol/L), flow rate = 1.5 ml/min, UV = 280 nm, major enantiomer t<sub>1</sub> = 5.78 min, minor enantiomer t<sub>2</sub> = 4.40 min; 64% ee.

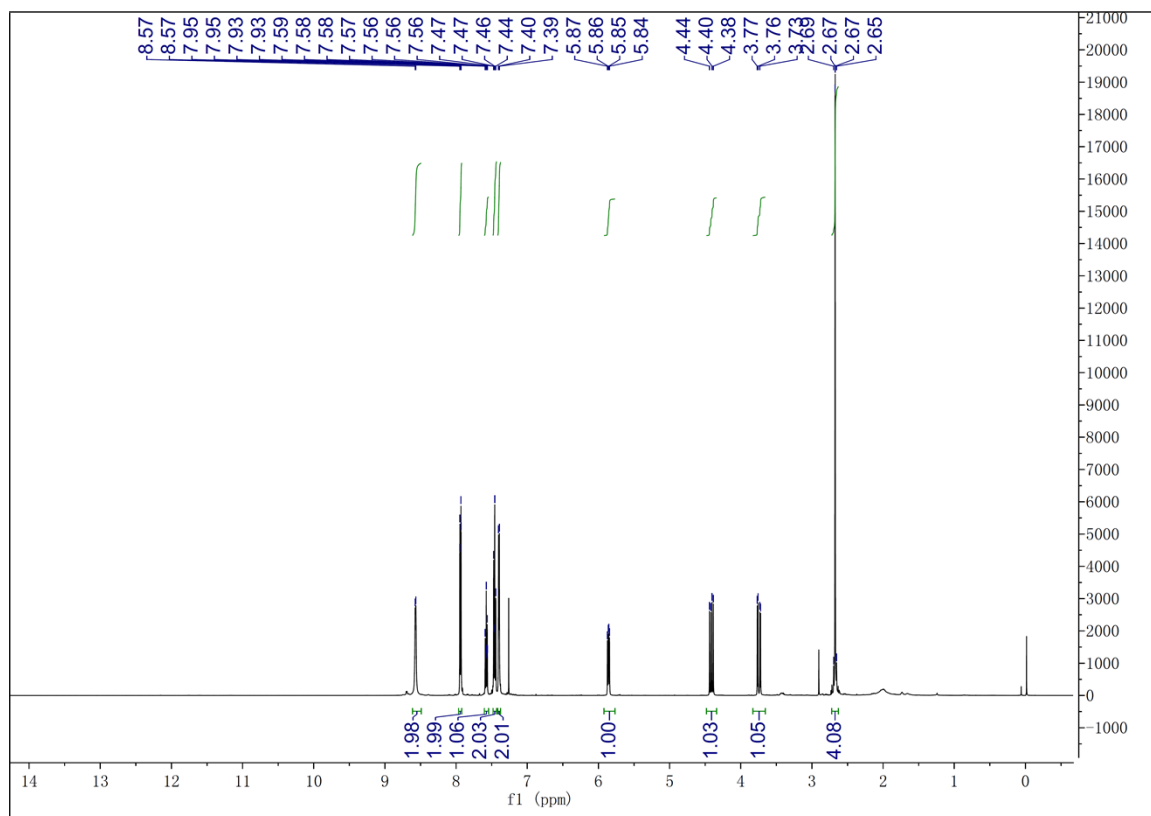

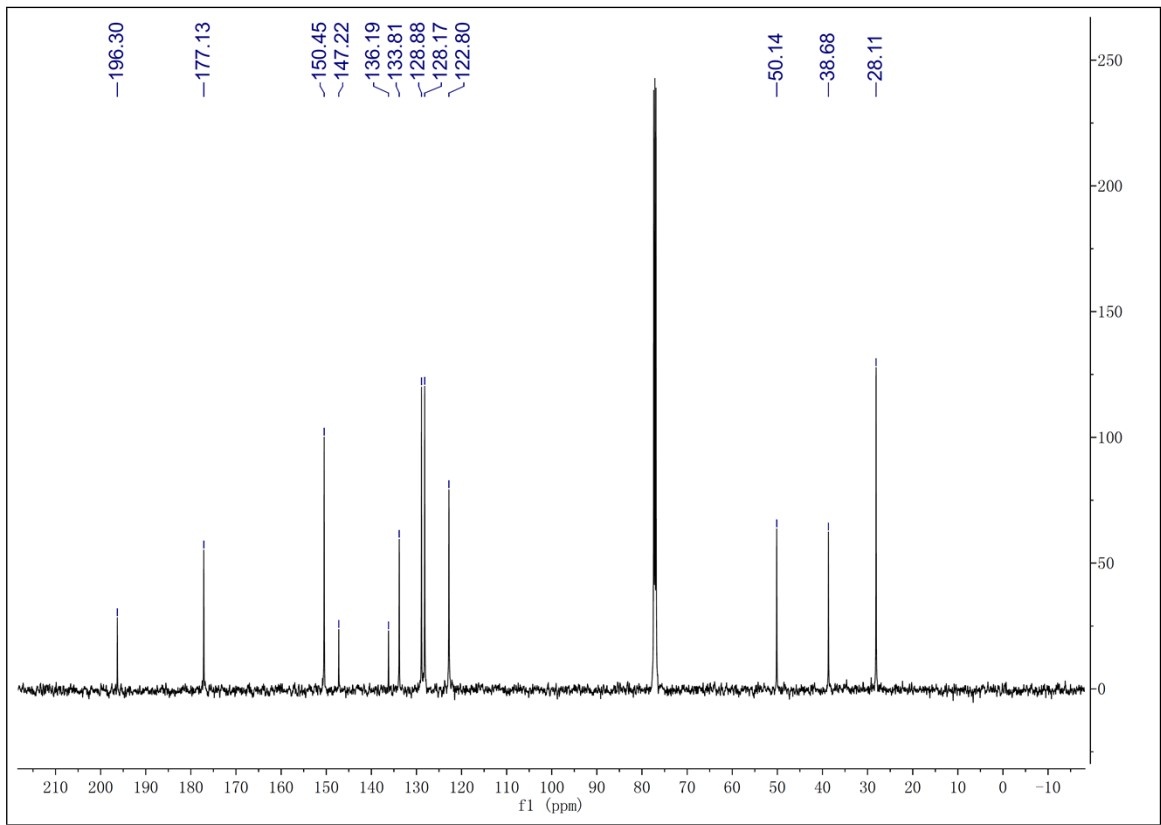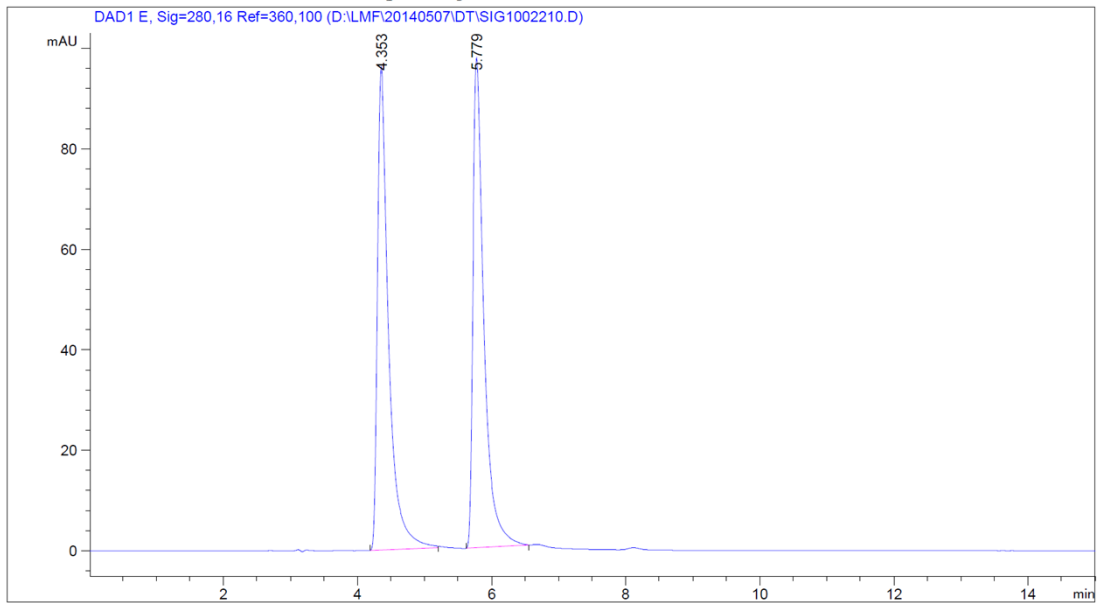

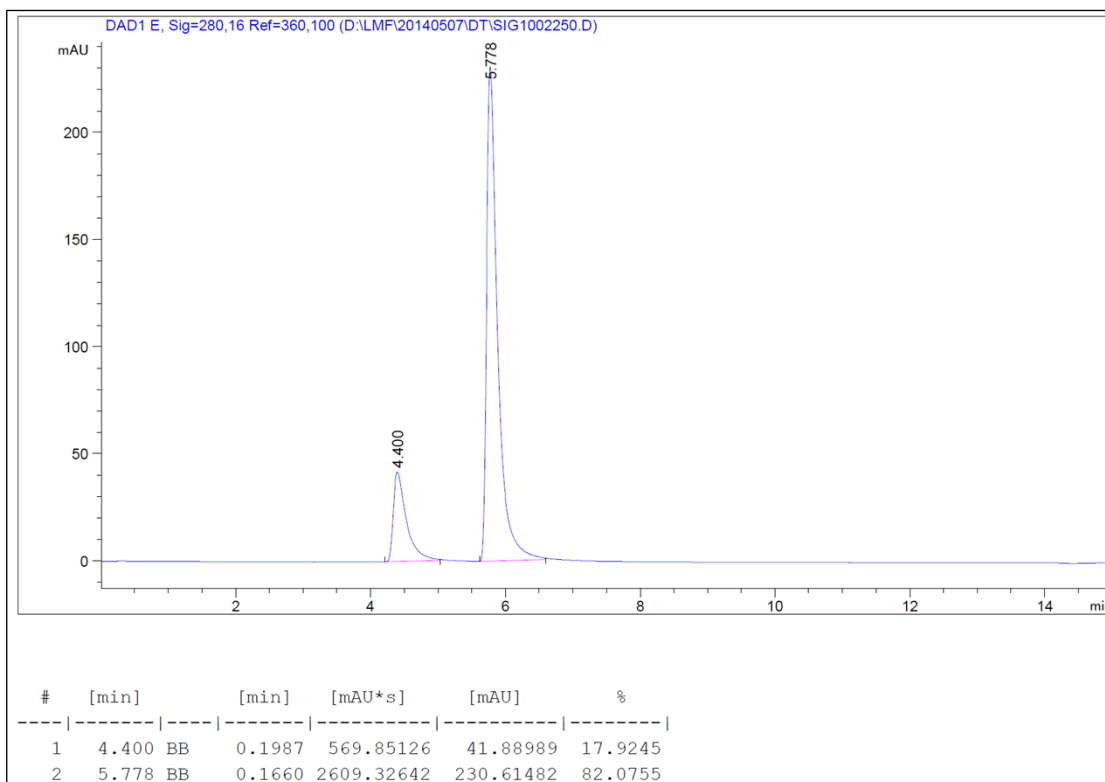

### 3.6 1-(3-(4-Methoxyphenyl)-3-oxo-1-phenylpropyl)pyrrolidine-2,5-dione (2f)

This compound was prepared according to the Section 2.2 and purified by column chromatography (petroleum ether : ethyl acetate = 6 : 1) to give a white solid (52% yield); m.p. 127-129°C. <sup>1</sup>H NMR (500 MHz, CDCl<sub>3</sub>) δ: 7.98 (d, J = 7.4 Hz, 2H), 7.65-7.37 (m, 5H), 6.88 (d, J = 8.7 Hz, 2H), 5.87-5.84 (m, 1H), 4.58-4.53 (m, 1H), 3.81 (s, 3H), 3.71-3.61 (m, 1H), 2.69-2.62 (m, 4H). <sup>13</sup>C NMR (125MHz, CDCl<sub>3</sub>) δ: 27.0, 38.3, 49.7, 54.3, 113.0, 127.1, 127.7, 128.4, 130.1, 132.4, 135.5, 158.4, 176.3, 196.0. HPLC analysis: Ultron ES-OVM column, 30:70 alcohol/KH<sub>2</sub>PO<sub>4</sub> (0.02 mol/L), flow rate = 2.0 ml/min, UV = 254 nm, major enantiomer t<sub>1</sub> = 1.86 min, minor enantiomer t<sub>2</sub> = 0.71min; 80% ee.

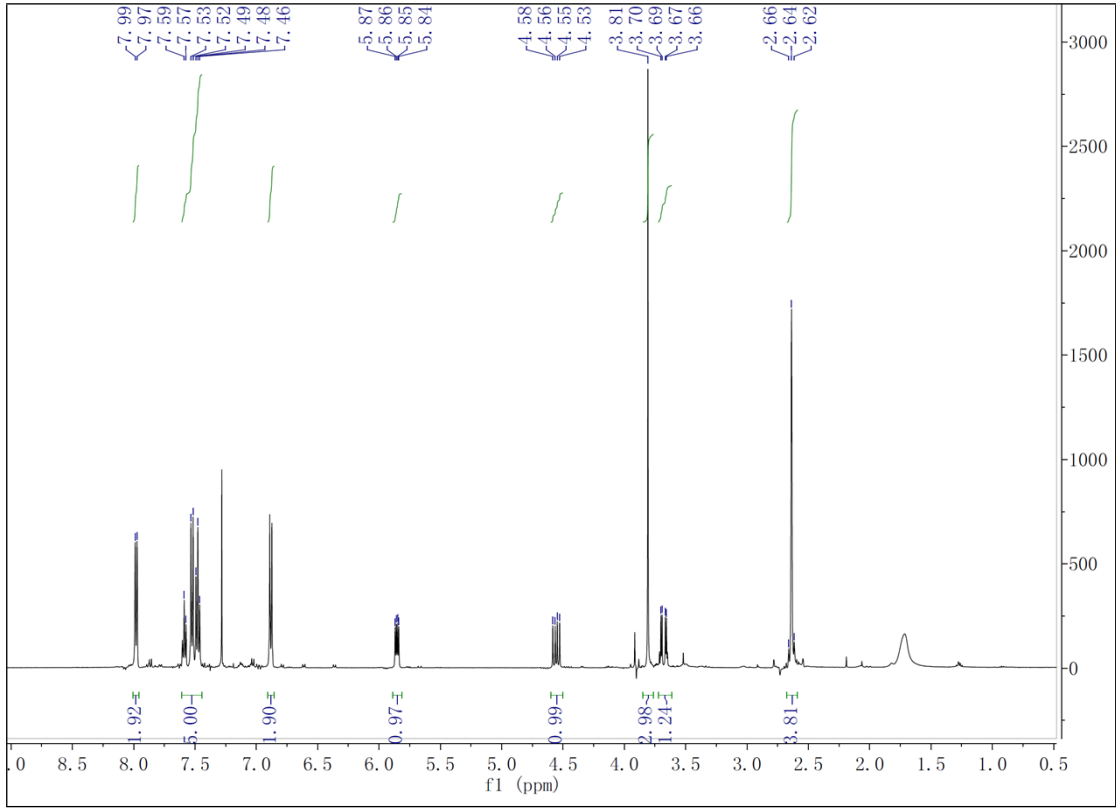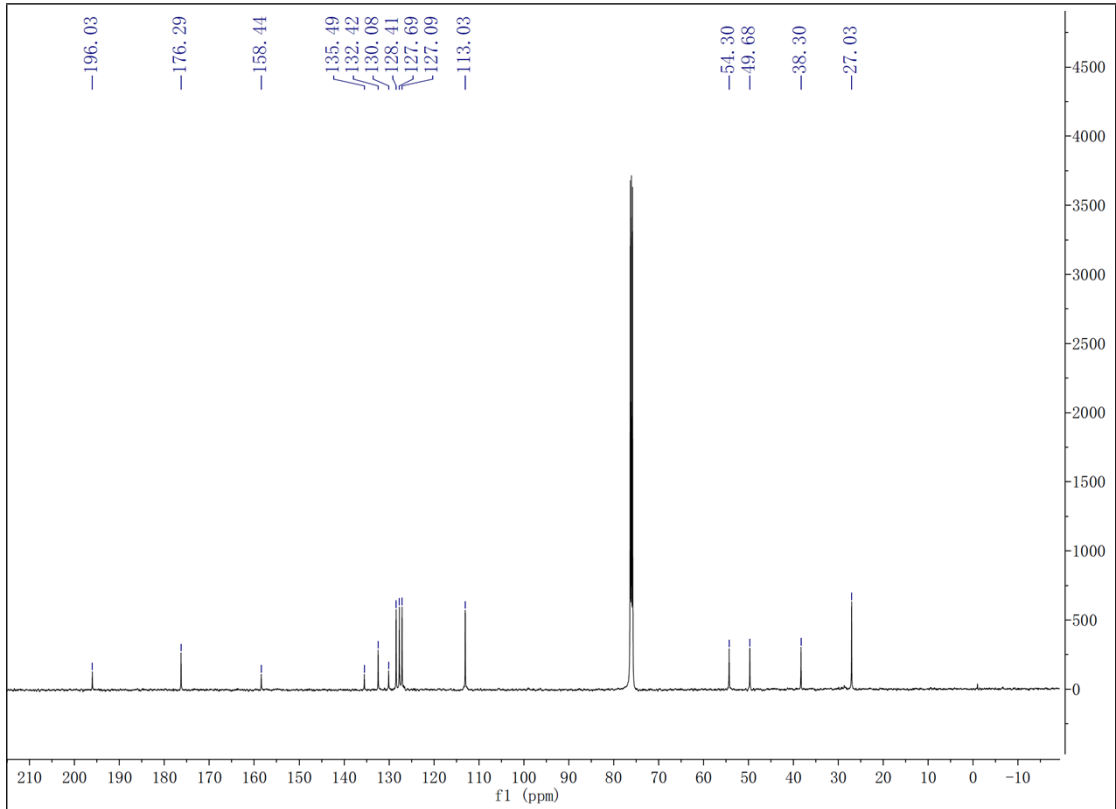



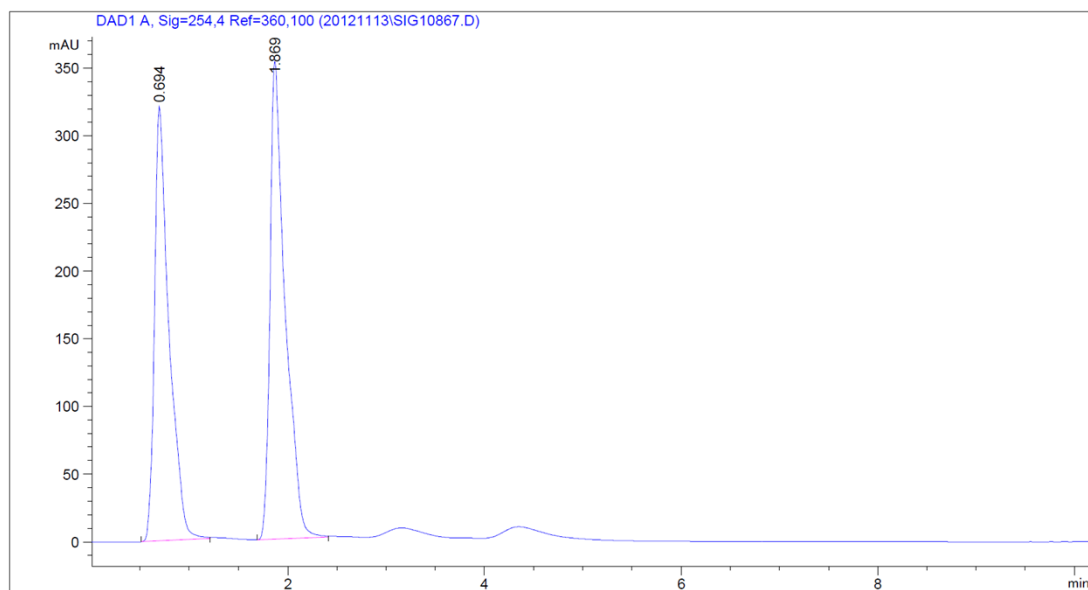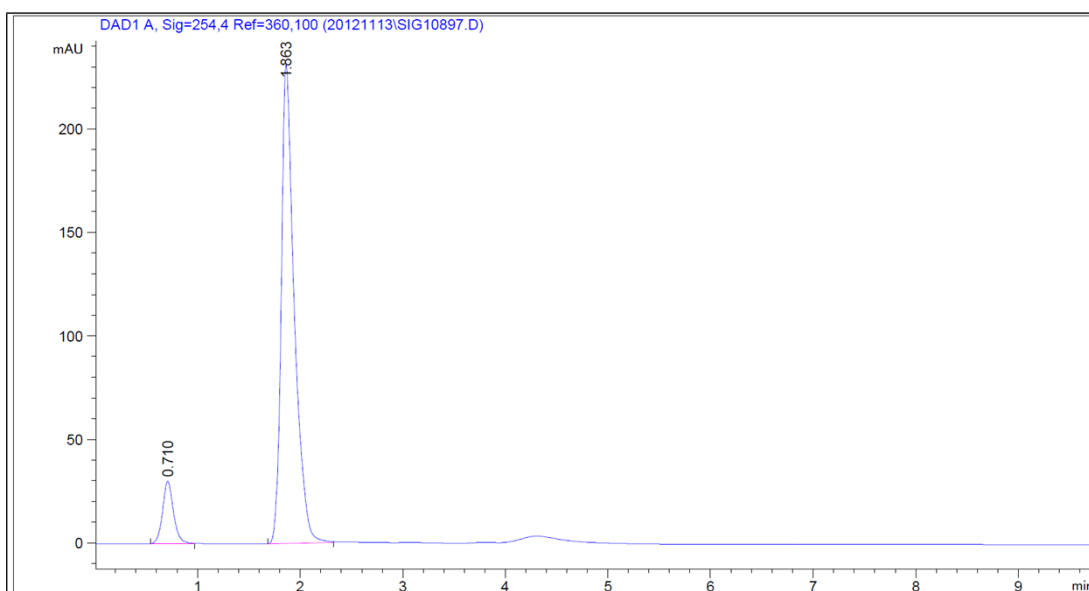

1: DAD1 A, Sig=254,4 Ref=360,100

| # | [min] |    | [min]  | [mAU*s]    | [mAU]     | %       |
|---|-------|----|--------|------------|-----------|---------|
| 1 | 0.710 | BB | 0.1125 | 223.83492  | 30.18915  | 9.8938  |
| 2 | 1.863 | BB | 0.1287 | 2038.55078 | 231.63240 | 90.1062 |

### 3.7 1-(3-(4-Methylphenyl)-3-oxo-1-phenylpropyl)pyrrolidine-2,5-dione (2g)

This compound was prepared according to the Section 2.2 and purified by column chromatography (petroleum ether : ethyl acetate = 6 : 1) to give a white solid (71% yield); m.p. 131-133°C. <sup>1</sup>H NMR (500 MHz, CDCl<sub>3</sub>) δ:7.87 (d, J = 7.8 Hz, 2H),

7.56 (d,  $J = 7.9$  Hz, 2H), 7.36-7.30 (m, 3H), 7.26 (d,  $J = 7.9$  Hz, 2H), 5.89-5.86 (m, 1H), 4.55-4.52 (m, 1H), 3.67-3.63 (m, 1H), 2.65-2.61 (m, 4H), 2.41 (s, 3H).  $^{13}\text{C}$  NMR (125MHz,  $\text{CDCl}_3$ )  $\delta$ : 20.7, 27.0, 38.0, 50.3, 127.1, 127.2, 127.8, 128.4, 133.0, 138.0, 143.3, 176.4, 195.6. HPLC analysis: Ultron ES-OVM column, 30:70 alcohol/ $\text{KH}_2\text{PO}_4$  (0.025 mol/L), flow rate = 1.2 ml/min, UV = 273 nm, major enantiomer  $t_1 = 2.71$  min, minor enantiomer  $t_2 = 1.52$ min; 76% *ee*.

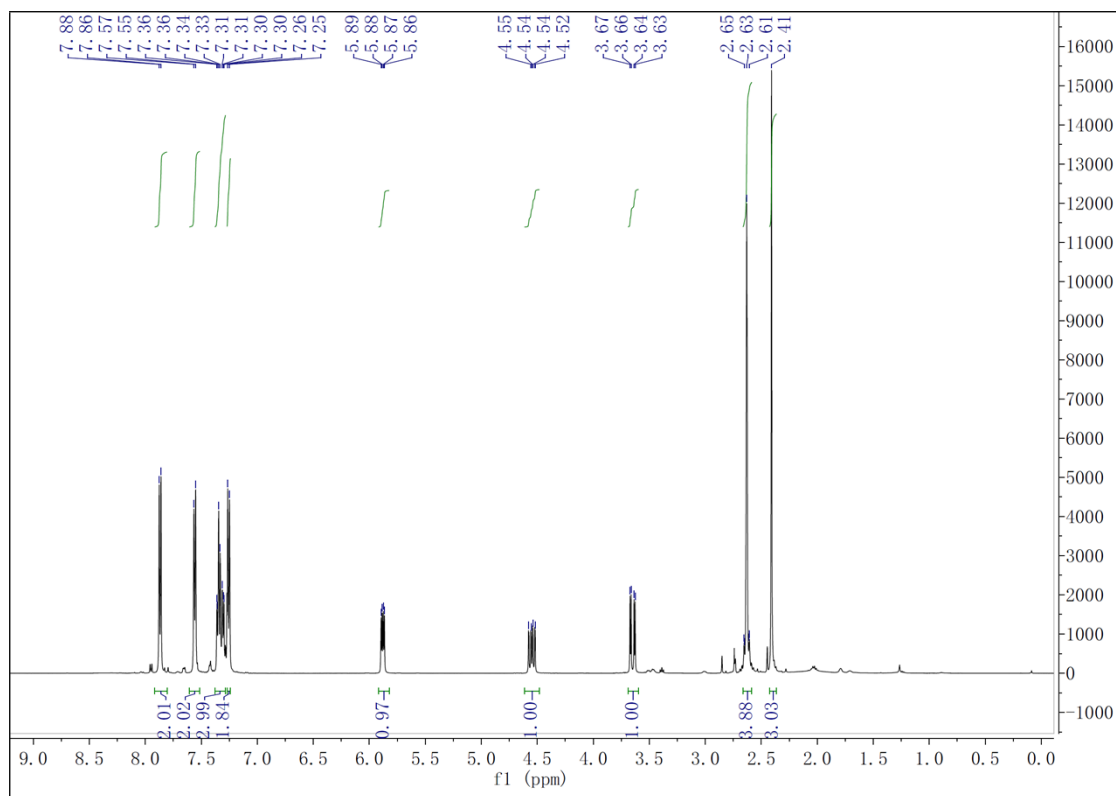

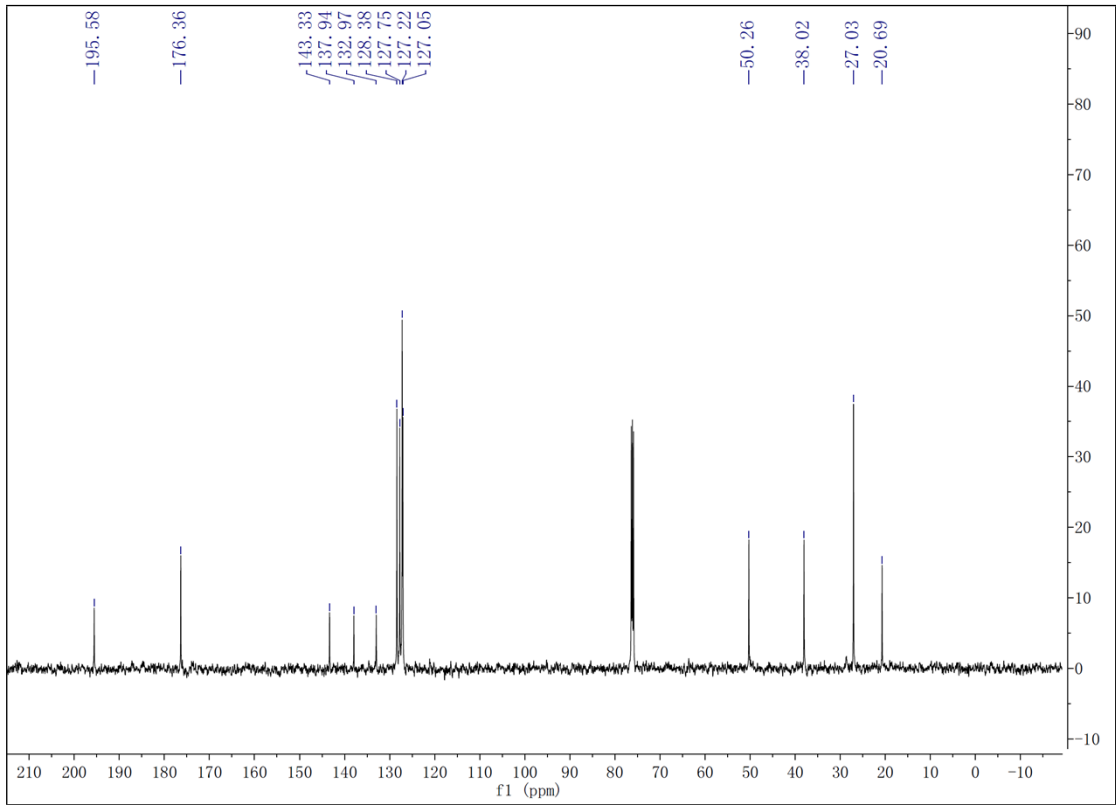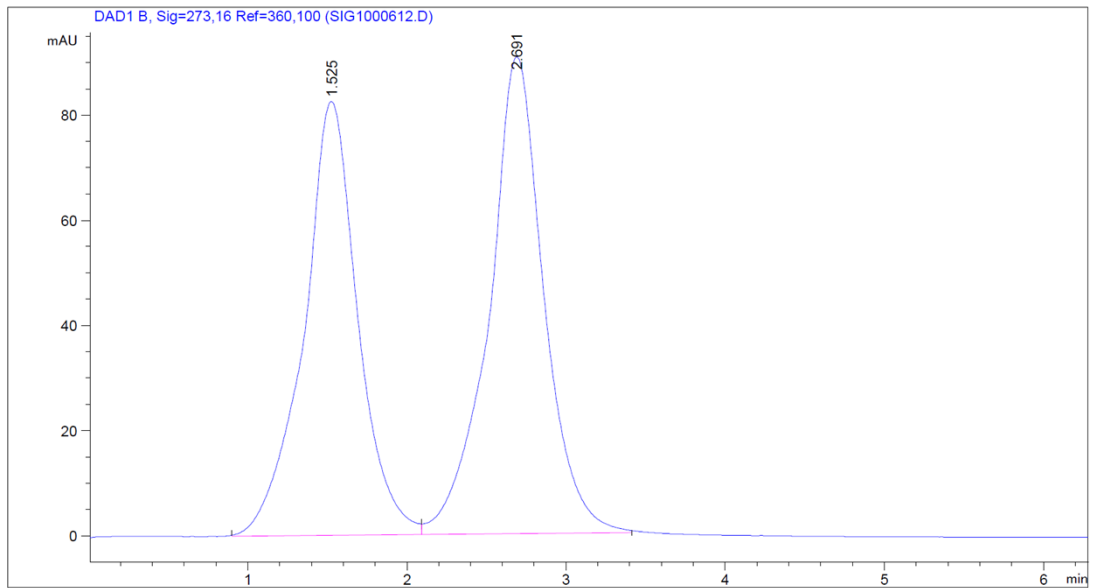

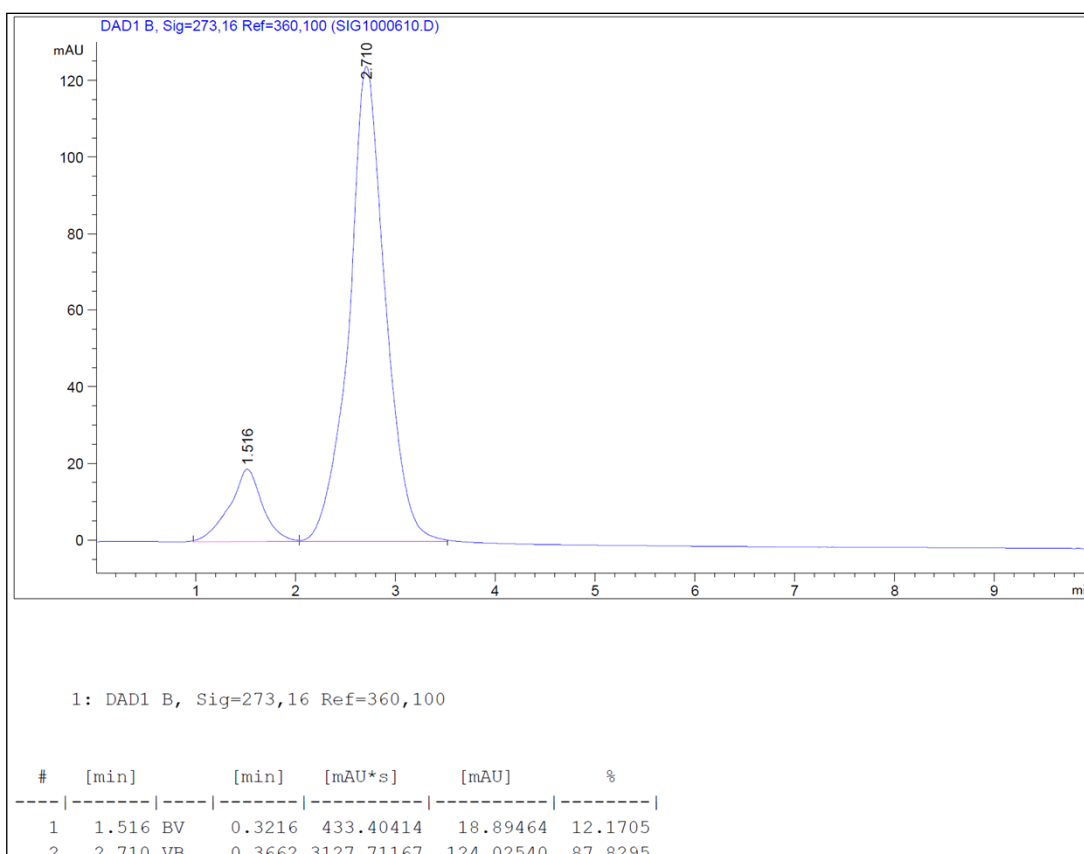

### 3.8 1-(3-(4-(Trifluoromethyl)-3-oxo-1-phenylpropyl) pyrrolidine-2,5-dione(2h)

This compound was prepared according to the Section 2.2 and purified by column chromatography (petroleum ether : ethyl acetate = 8 : 1) to give a white solid (60% yield); m.p. 144-146°C. <sup>1</sup>H NMR (500 MHz, CDCl<sub>3</sub>) δ: 7.96 (d, J = 7.5 Hz, 2H), 7.60-7.57 (m, 1H), 7.52-7.47 (m, 4H), 7.32 (d, J = 8.4 Hz, 2H), 5.88-5.85 (m, 1H), 4.51-4.46 (m, 1H), 3.74-3.69 (m, 1H), 2.67-2.63 (m, 4H). <sup>13</sup>C NMR (125MHz, CDCl<sub>3</sub>) δ: 26.1, 38.2, 48.8, 123.9, 127.2, 127.9, 128.5, 129.9, 133.8, 134.6, 136.9, 138.2, 179.3, 198.3. <sup>19</sup>F NMR (500 MHz, CDCl<sub>3</sub>) δ: -63.18. ESI-MS (m/z): 376 ([M+H]<sup>+</sup>). Anal. calcd. for C<sub>20</sub>H<sub>16</sub>F<sub>3</sub>NO<sub>3</sub>: C, 64.00; H, 4.30; N, 3.73. Found: C, 64.18; H, 4.22; N, 3.67. HPLC analysis: Ultron ES-OVM column, 30:70 alcohol/KH<sub>2</sub>PO<sub>4</sub> (0.025 mol/L), flow rate = 1.5 ml/min, UV = 254 nm, major enantiomer t<sub>1</sub> = 2.46 min, minor enantiomer t<sub>2</sub> = 1.26min; 66% ee.

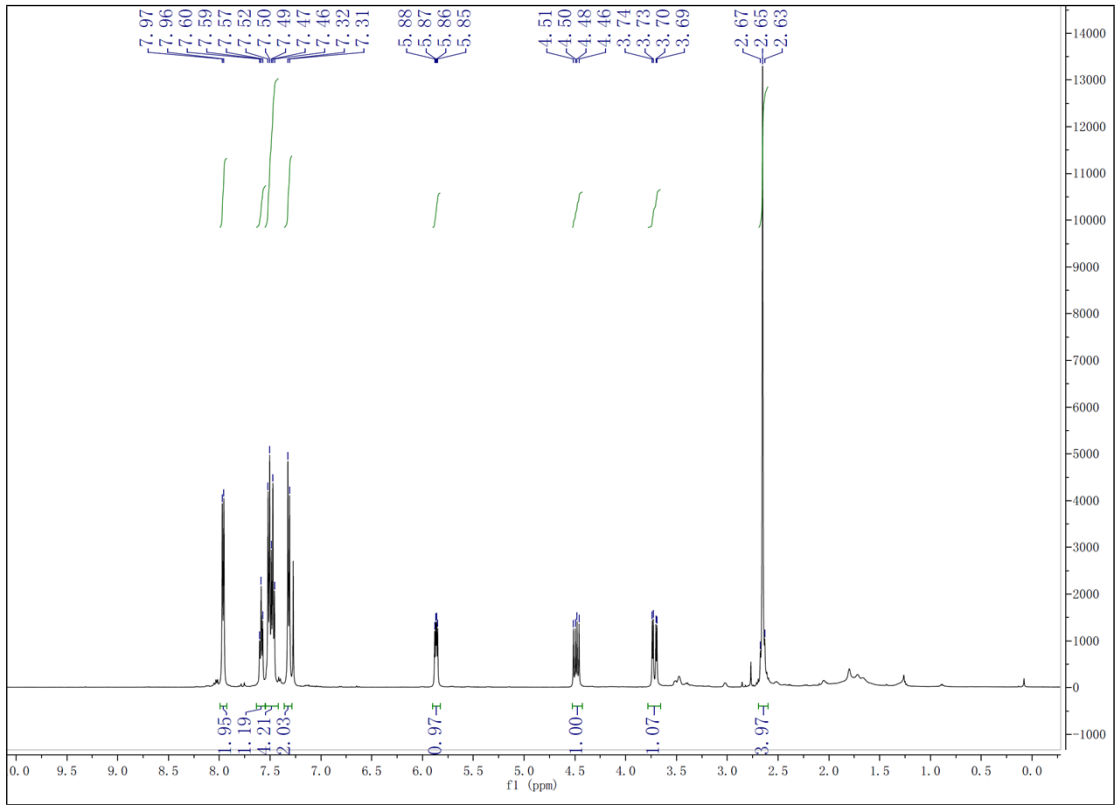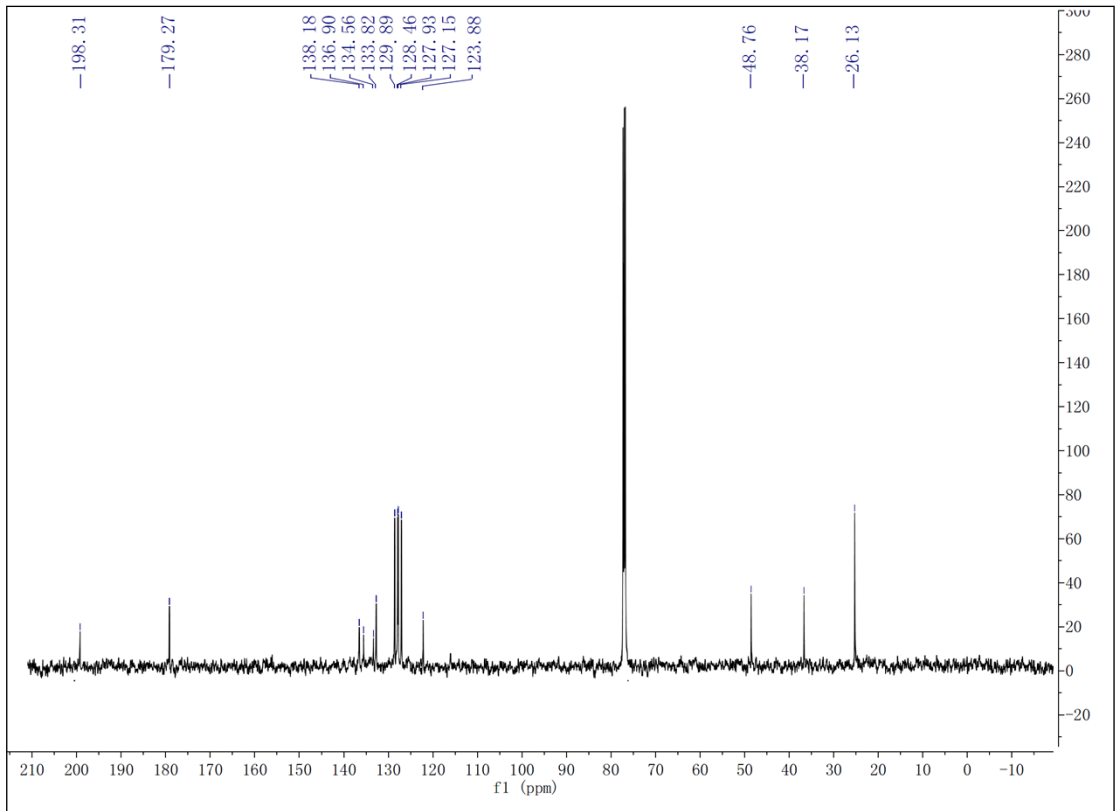

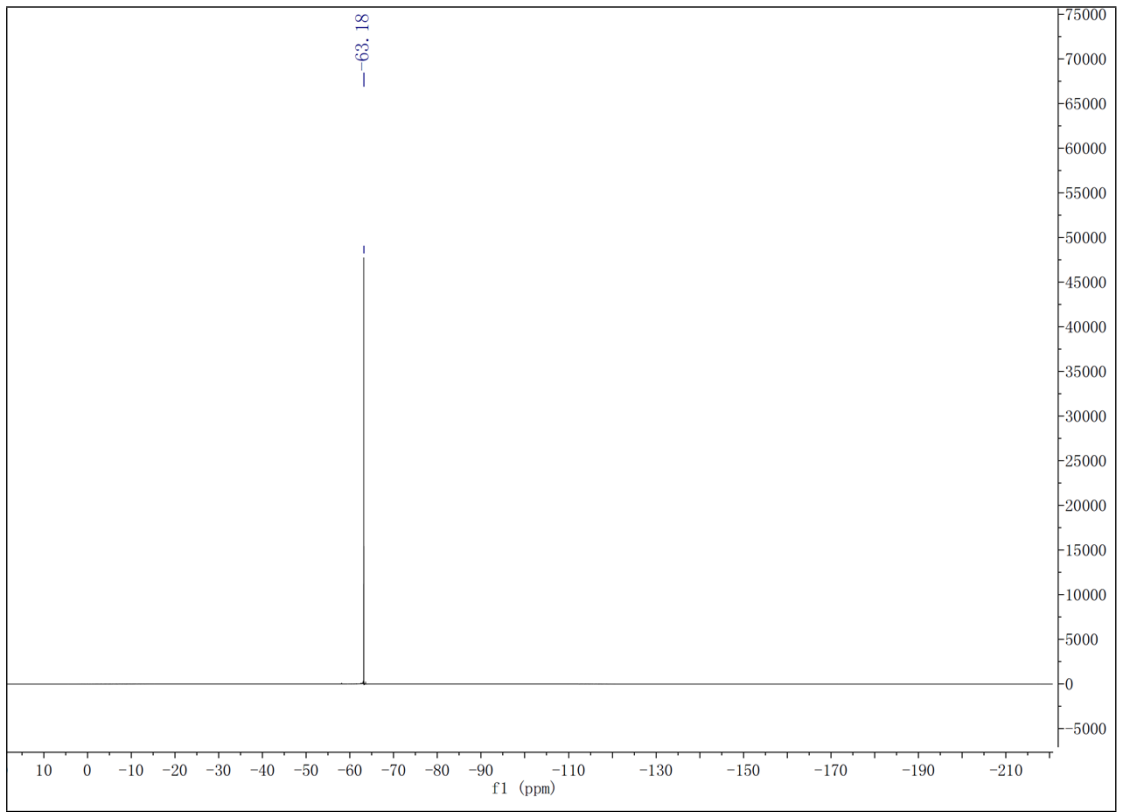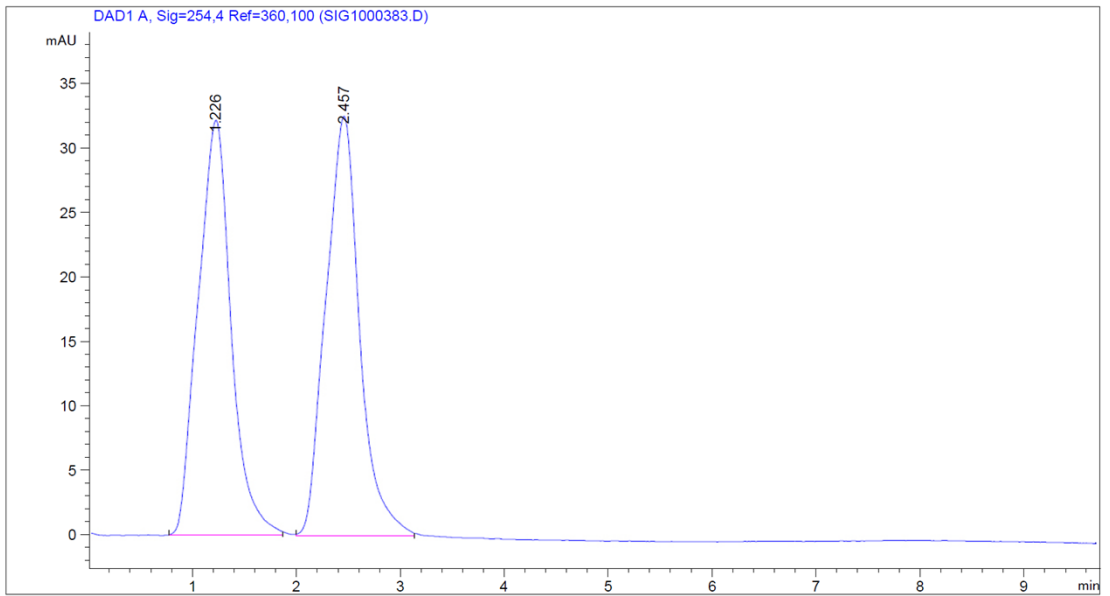

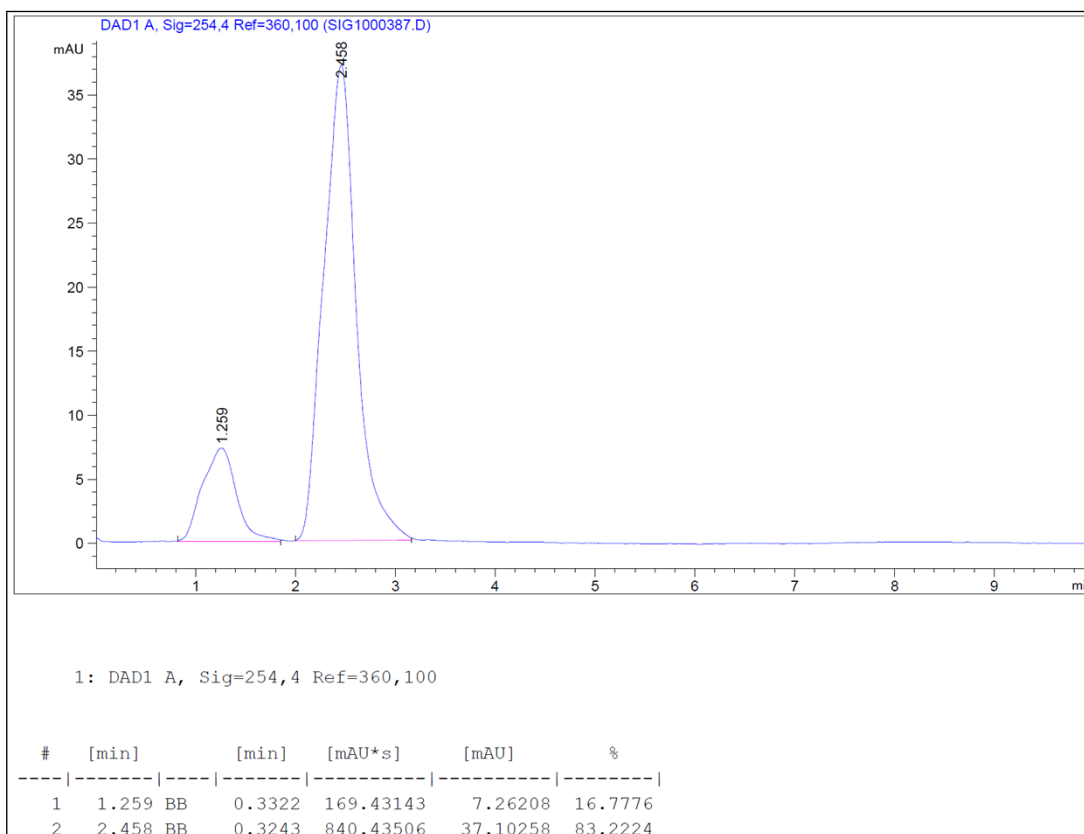

### 3.9 1-(3-(4-Bromophenyl)-3-oxo-1-phenylpropyl)pyrrolidine-2,5-dione(2i)

This compound was prepared according to the Section 2.2 and purified by column chromatography (petroleum ether : ethyl acetate = 7 : 1) to give a white solid (72% yield); m.p. 149-151°C. <sup>1</sup>H NMR (500 MHz, CDCl<sub>3</sub>) δ: 7.81(d, J = 10 Hz, 2H), 7.60-7.52 (m,4H), 7.35-7.29 (m, 3H), 5.85-5.82 (m, 1H), 4.56-4.51 (m, 1H), 3.63-3.59 (m, 1H), 2.65-2.60 (m, 4H). <sup>13</sup>C NMR (125MHz, CDCl<sub>3</sub>) δ: 27.0, 38.1, 49.6, 127.1, 127.8, 128.0, 132.6, 133.2, 135.3, 136.3, 176.2, 195.6. HPLC analysis: Ultron ES-OVM column, 30:70 alcohol/KH<sub>2</sub>PO<sub>4</sub>(0.02 mol/L), flow rate = 1.2 ml/min, UV = 230 nm, major enantiomer t<sub>1</sub> = 3.00 min, minor enantiomer t<sub>2</sub> = 1.64min; 92% ee.

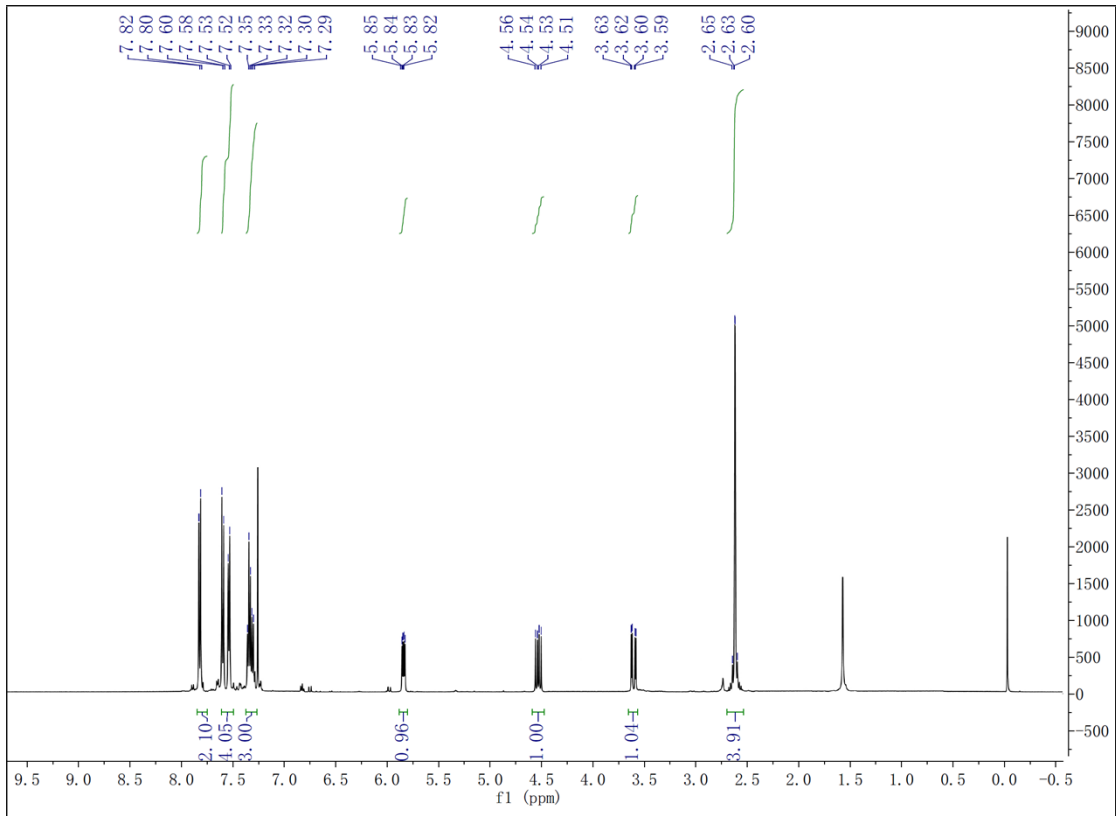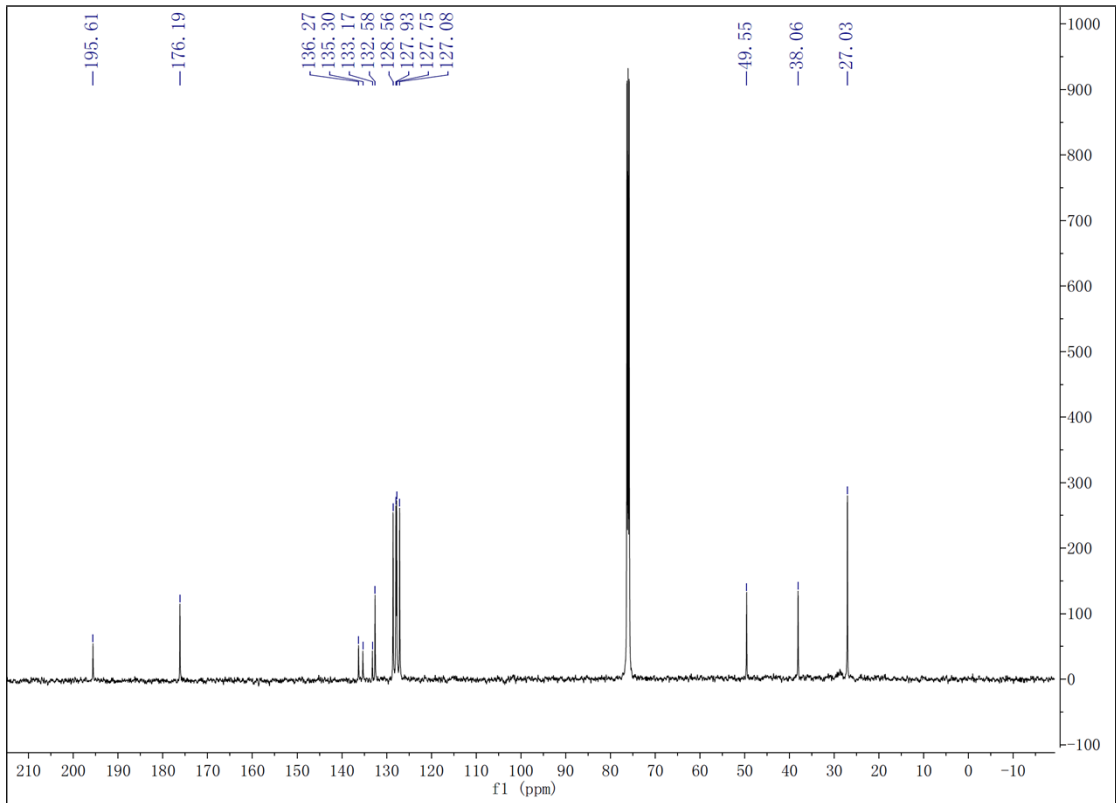



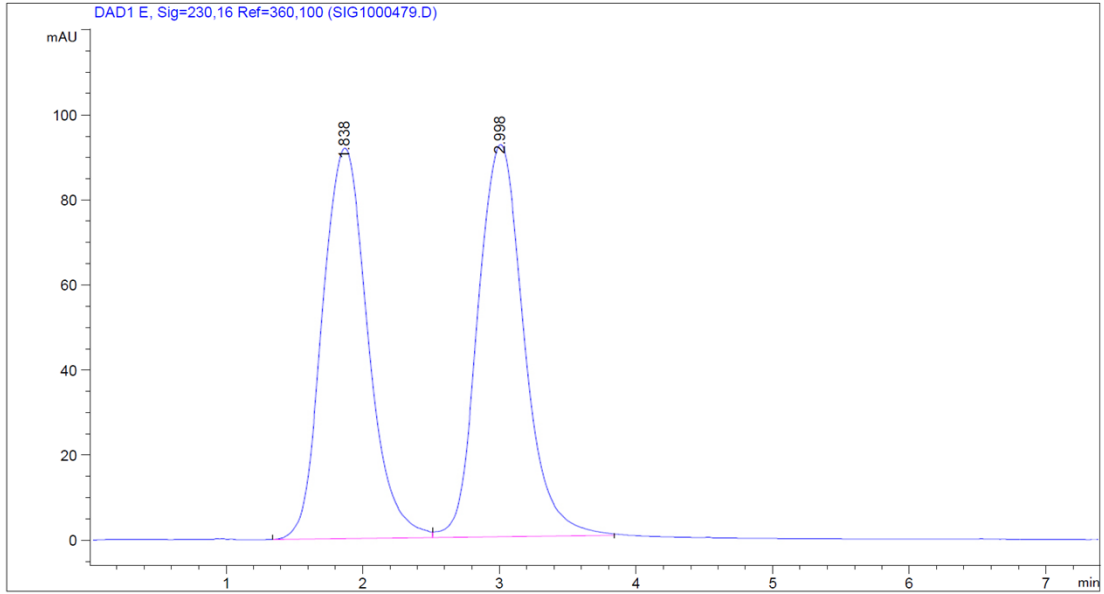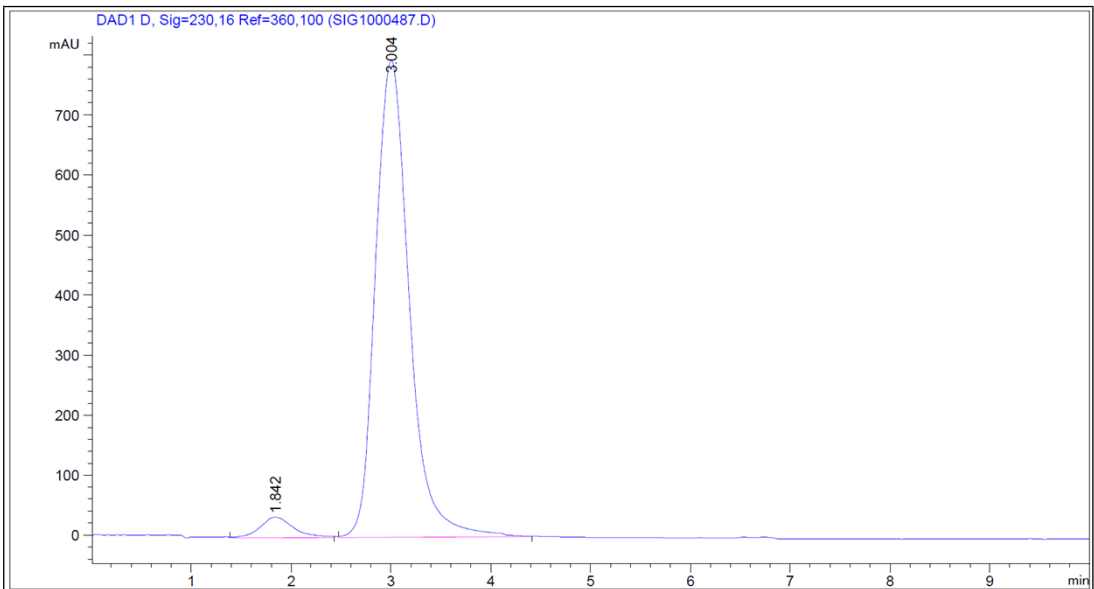

1: DAD1 D, Sig=230,16 Ref=360,100

| # | [min] |    | [min]  | [mAU*s]   | [mAU]     | %       |
|---|-------|----|--------|-----------|-----------|---------|
| 1 | 1.842 | VB | 0.3261 | 797.54169 | 34.20163  | 4.0981  |
| 2 | 3.004 | BB | 0.3721 | 1.86637e4 | 794.35223 | 95.9019 |
